# Supplementary material for: Concordance between RNA-sequencing data and DNA microarray data in transcriptome analysis of proliferative and quiescent fibroblasts
Source: PubMed Central journal article supplement (PMC4593695; doi:10.1098/rsos.150402), 2015-09-30
Supplement: rsos150402supp2.pdf [file rsos150402supp2.pdf]

Concordance between RNA-seq data and DNA microarray data in transcriptome analysis of proliferative and quiescent fibroblasts

Supplementary figures and tables

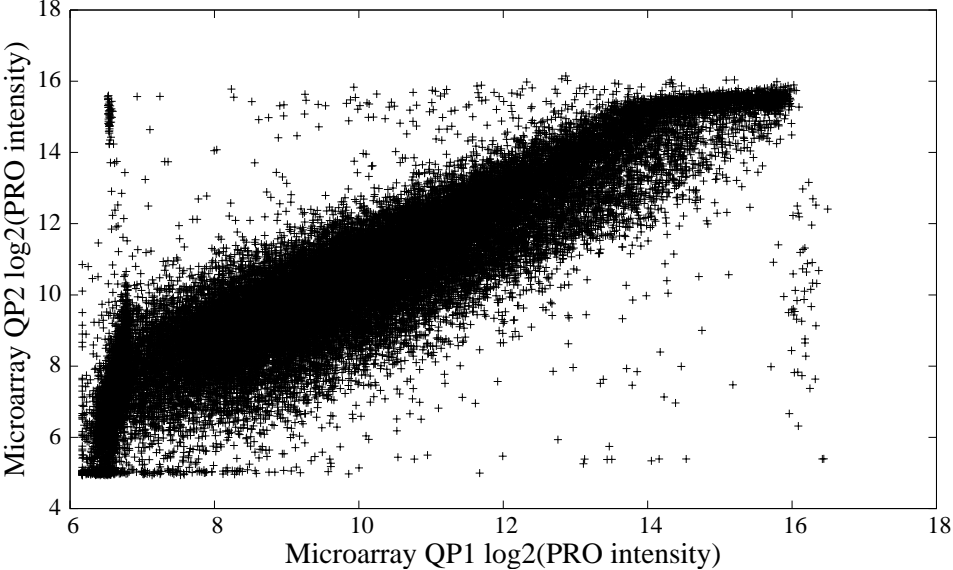

Supplementary Figure S1: The log-transformed PRO intensity values from microarray QP1 and microarray QP2 had a strong correlation ( $r = 0.89$ ).

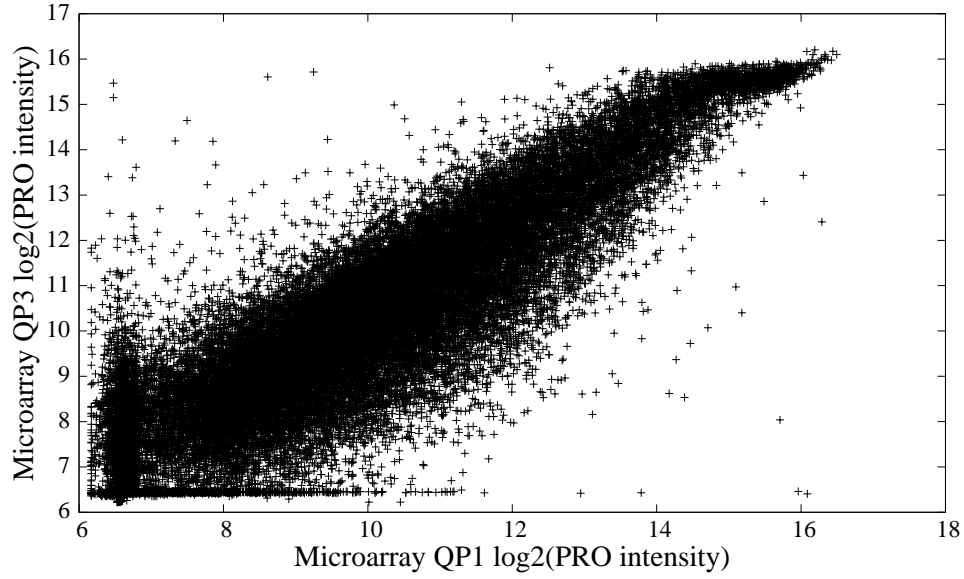

Supplementary Figure S2: The log-transformed PRO intensity values from microarray QP1 and microarray QP3 had a strong correlation ( $r = 0.89$ ).

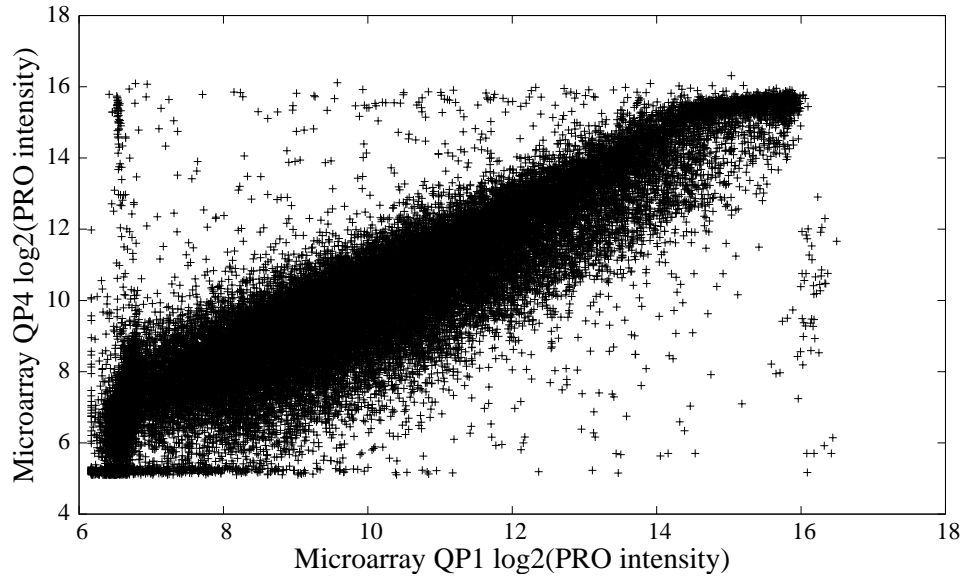

Supplementary Figure S3: The log-transformed PRO intensity values from microarray QP1 and microarray QP4 had a strong correlation ( $r = 0.87$ ).

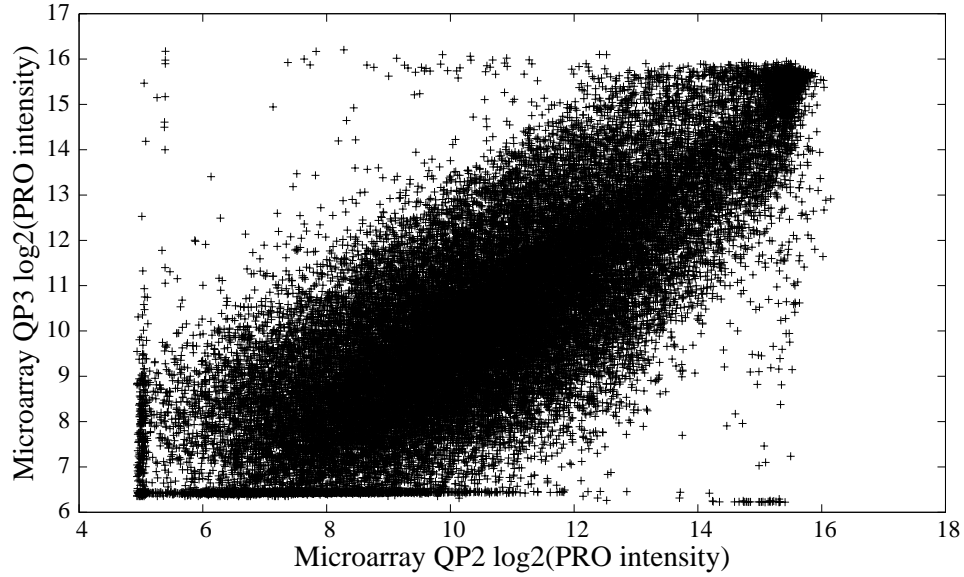

Supplementary Figure S4: The log-transformed PRO intensity values from microarray QP2 and microarray QP3 had a moderately strong correlation ( $r = 0.78$ ).

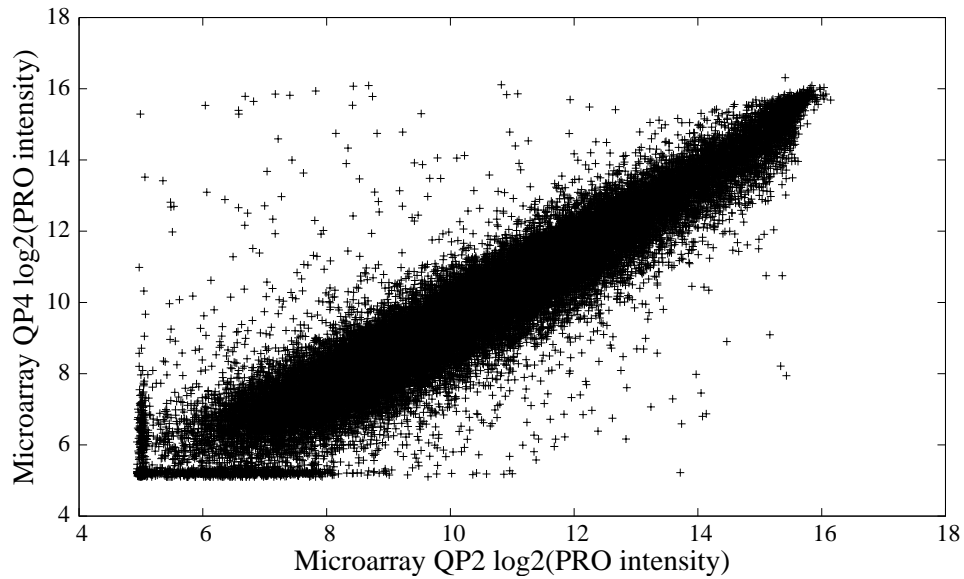

Supplementary Figure S5: The log-transformed PRO intensity values from microarray QP2 and microarray QP4 had a strong correlation ( $r = 0.94$ ).

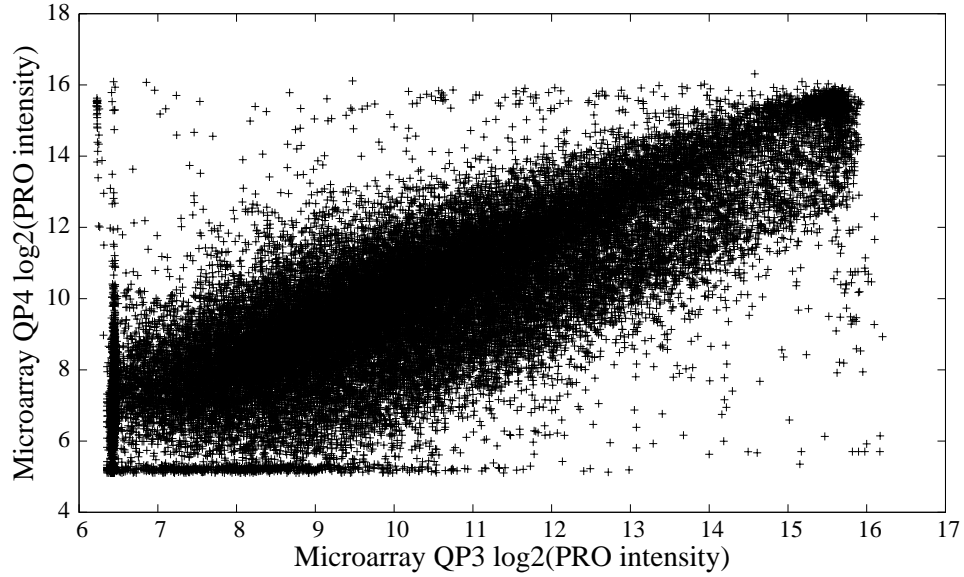

Supplementary Figure S6: The log-transformed PRO intensity values from microarray QP3 and microarray QP4 had a strong correlation ( $r = 0.80$ ).

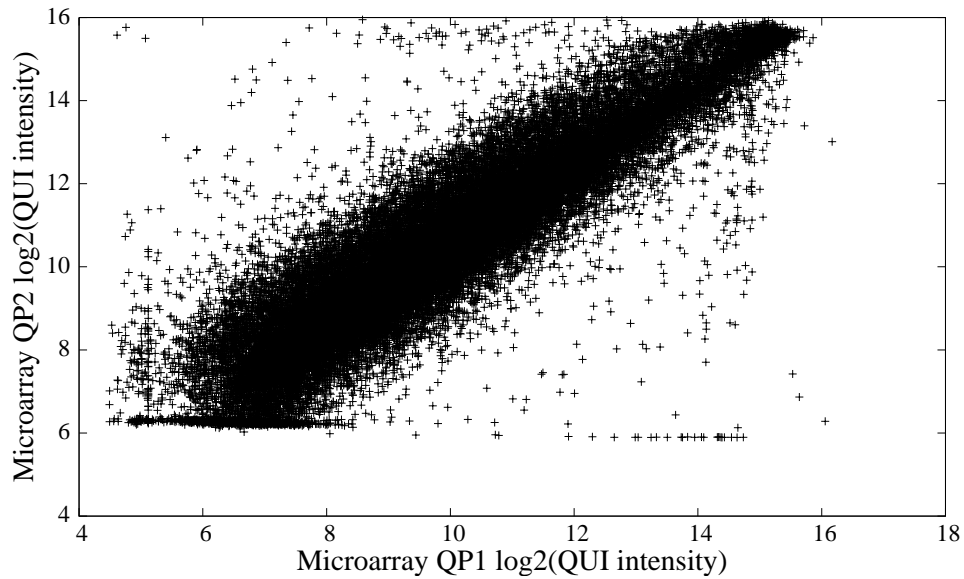

Supplementary Figure S7: The log-transformed QUI intensity values from microarray QP1 and microarray QP2 had a strong correlation ( $r = 0.91$ ).



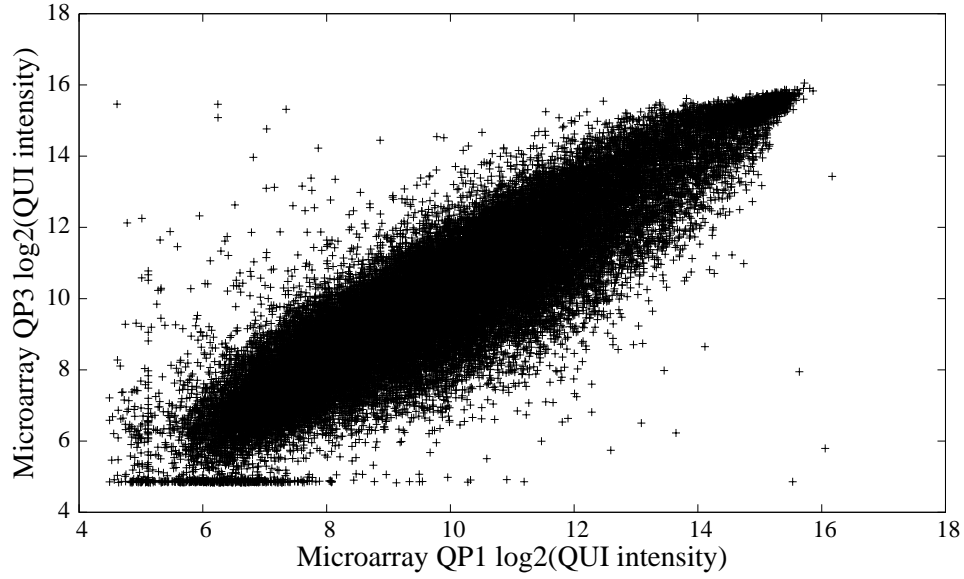

Supplementary Figure S8: The log-transformed QUI intensity values from microarray QP1 and microarray QP3 had a strong correlation ( $r = 0.90$ ).

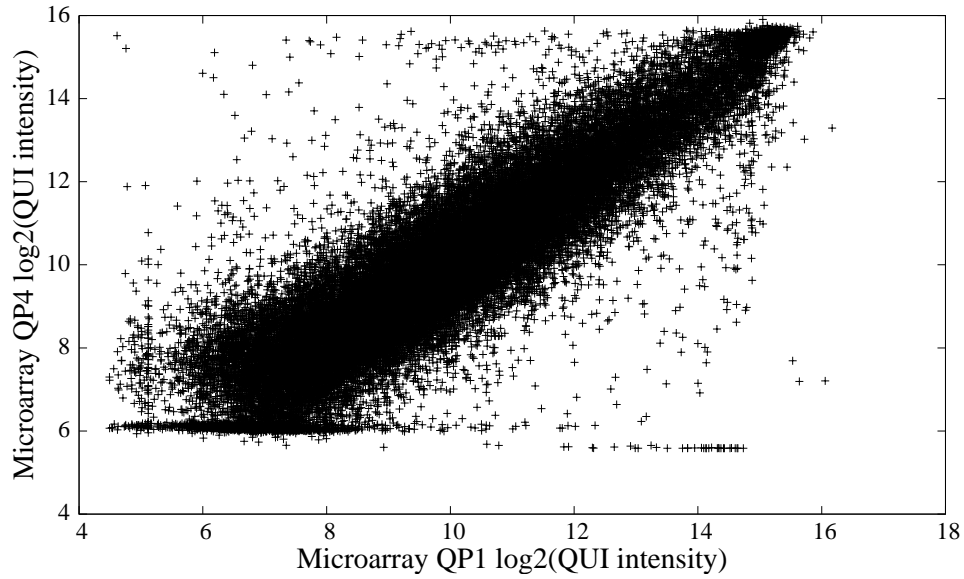

Supplementary Figure S9: The log-transformed QUI intensity values from microarray QP1 and microarray QP4 had a strong correlation ( $r = 0.89$ ).

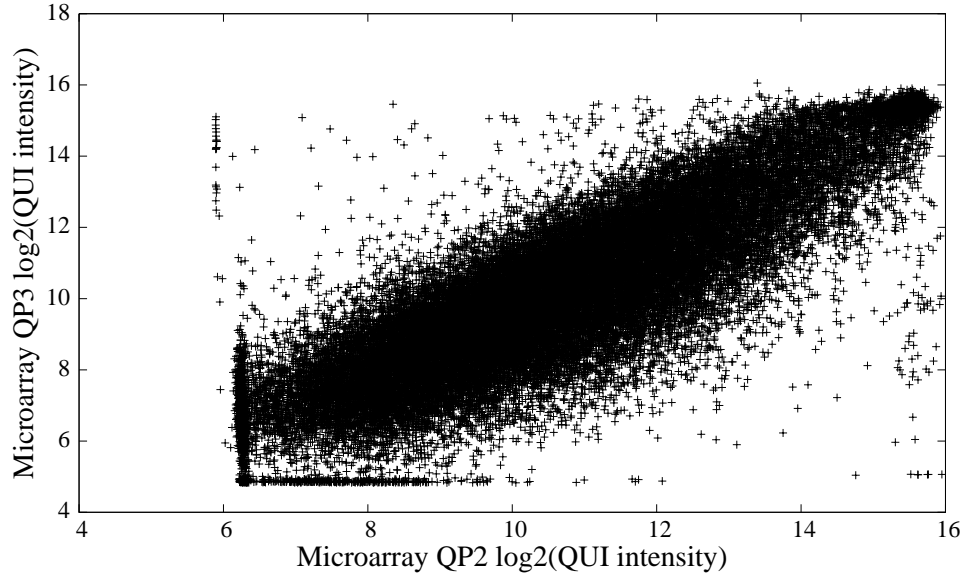

Supplementary Figure S10: The log-transformed QUI intensity values from microarray QP2 and microarray QP3 had a strong correlation ( $r = 0.85$ ).

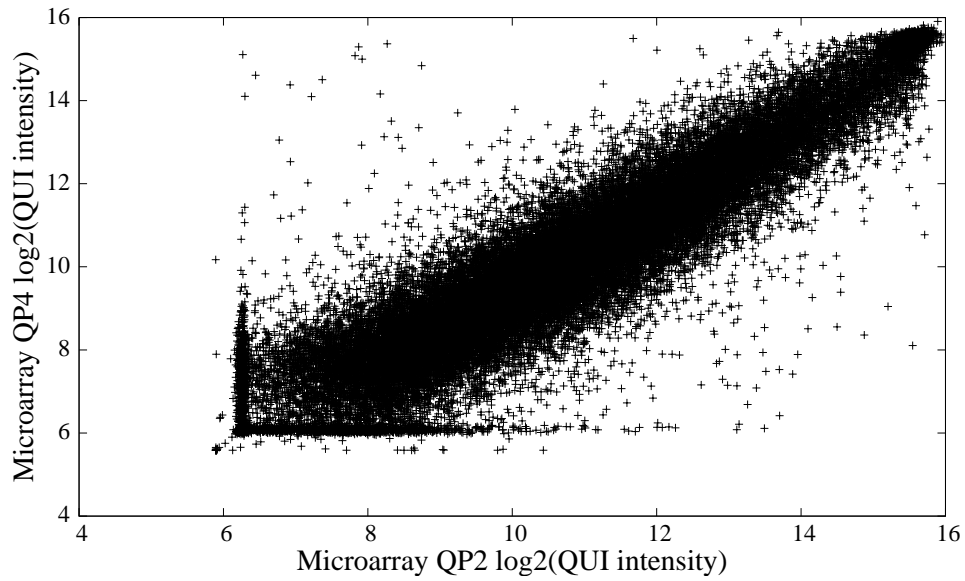

Supplementary Figure S11: The log-transformed QUI intensity values from microarray QP2 and microarray QP4 had a strong correlation ( $r = 0.92$ ).

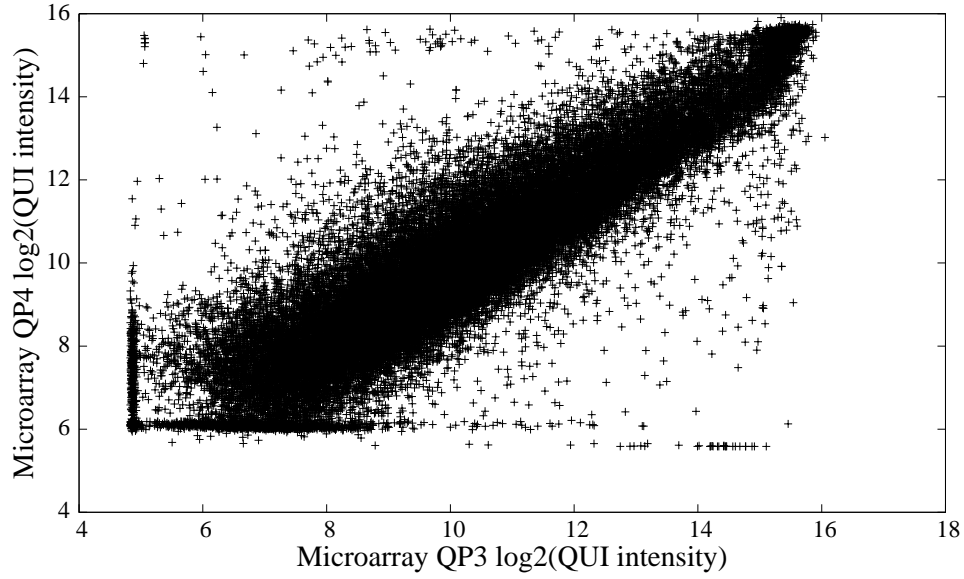

Supplementary Figure S12: The log-transformed QUI intensity values from microarray QP3 and microarray QP4 had a strong correlation ( $r = 0.89$ ).

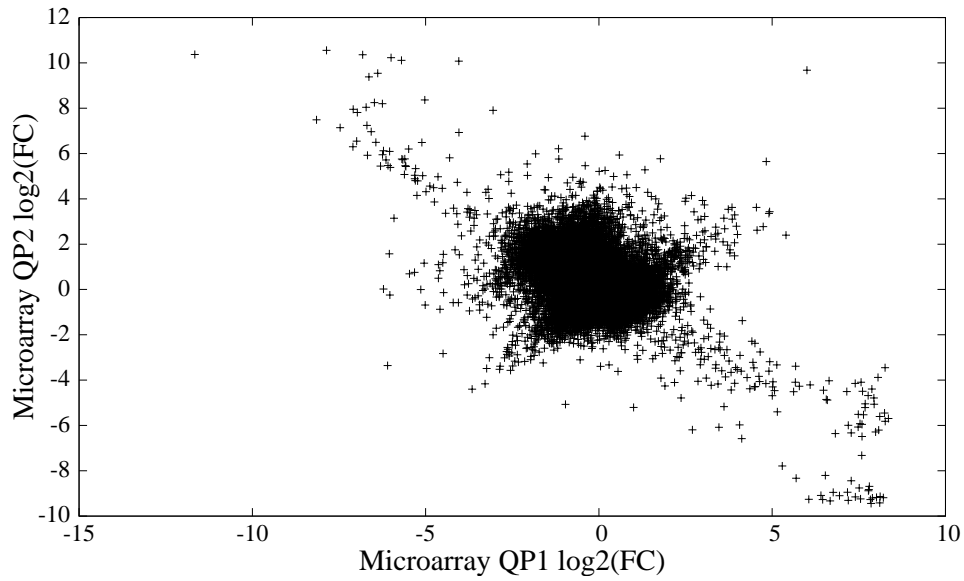

Supplementary Figure S13: The log-transformed FC values from microarray QP1 and microarray QP2 had a negative correlation ( $r = -0.46$ ).

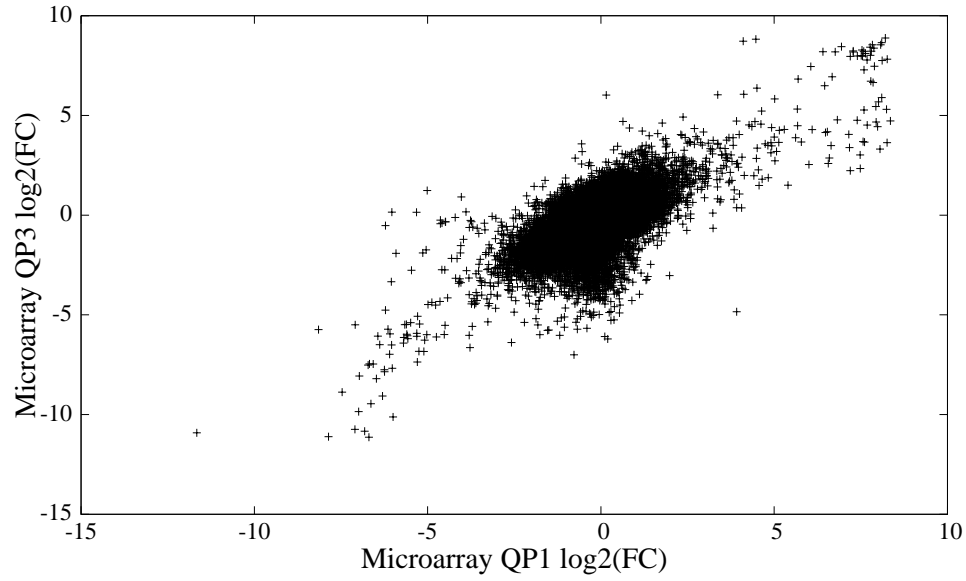

Supplementary Figure S14: The log-transformed FC values from microarray QP1 and microarray QP3 had a moderate to strong correlation ( $r = 0.70$ ).

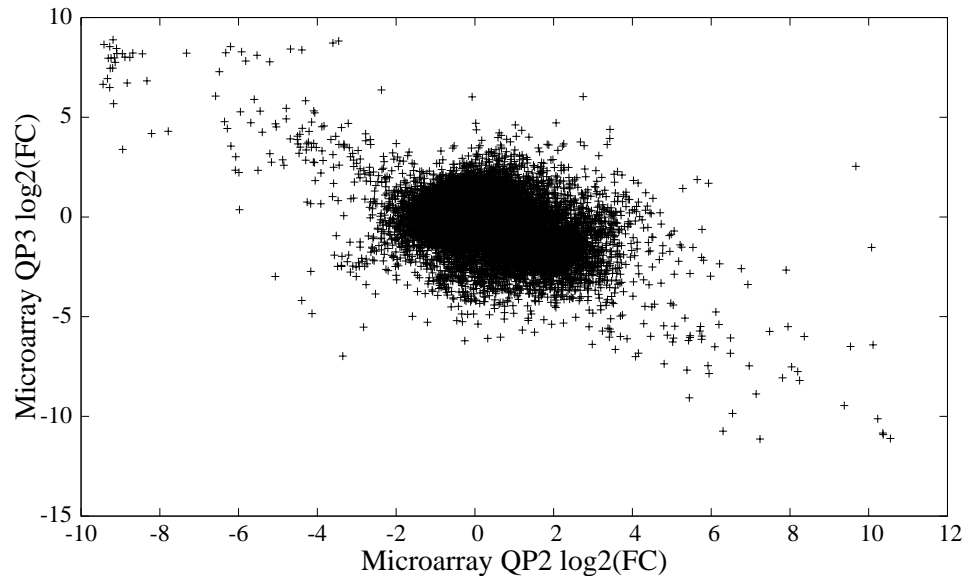

Supplementary Figure S15: The log-transformed FC values from microarray QP2 and microarray QP3 had a negative correlation ( $r = -0.55$ ).

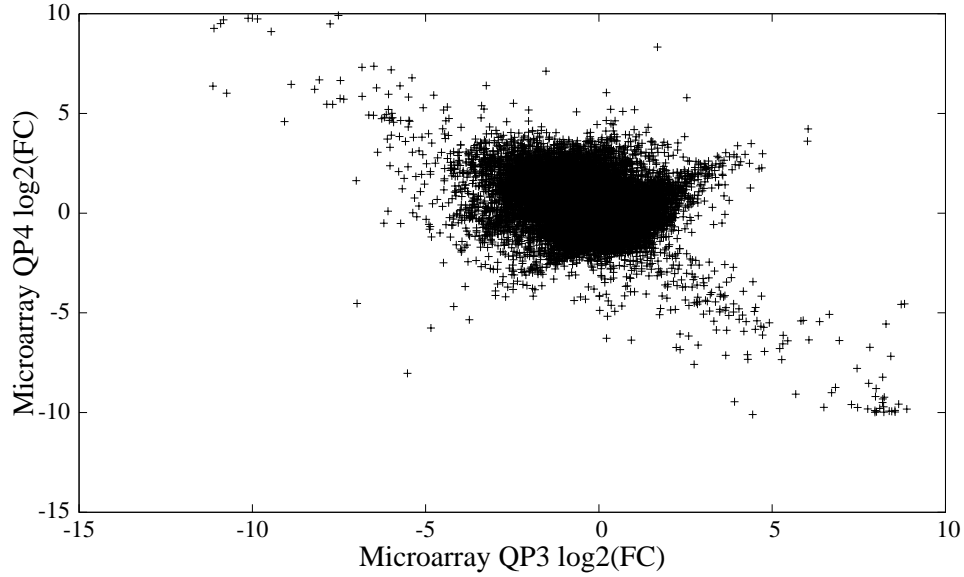

Supplementary Figure S16: The log-transformed FC values from microarray QP3 and microarray QP4 had a negative correlation ( $r = -0.44$ ).

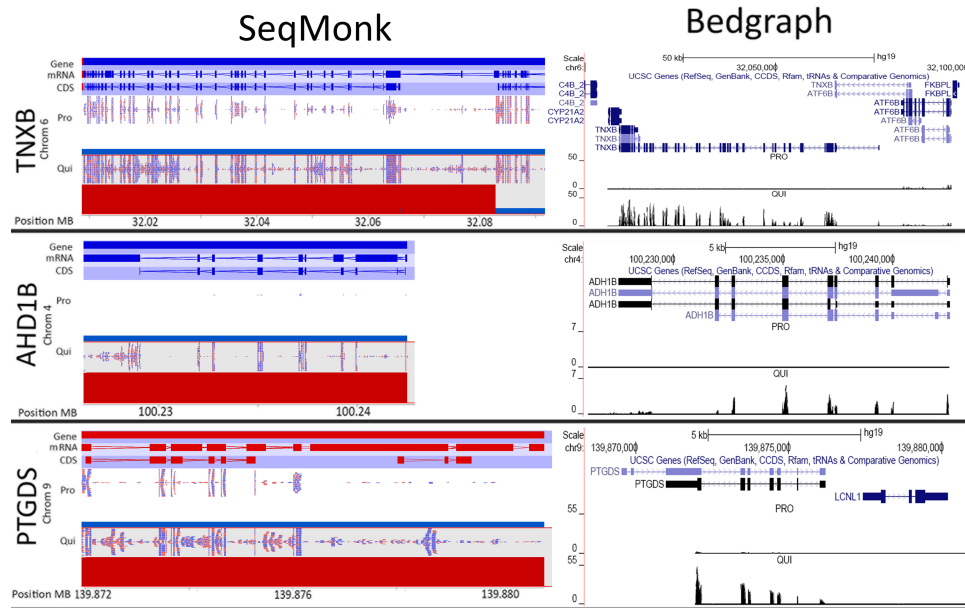

Supplementary Figure S17: RNA-seq reads from proliferative and quiescent samples. Mapped RNA-seq data were imported into SeqMonk and quantified using the RPKM method (left column). Reads for the *TNXB* (top panel), *AHD1B* (middle panel), and *PTGDS* (lower panel) genes are shown. For each gene, the gene length, mRNA (exons are shown as blocks with introns shown as arrowheads) and coding regions are indicated. Arrows and color indicate the direction of the gene on the chromosome (red, left to right; blue, right to left). Reads from proliferative (Pro) and quiescent (Qui) samples are shown (blue dash, right to left mapped read; red dash, left to right mapped read). Bars under the reads represent fold change; blue bar for proliferative reads is set to 1 as the baseline. Red bar under Qui reads represents the fold change

as compared to Pro reads; *TNXB* (Chromosome 6), 47-fold increase; *AHD1B* (Chromosome 4), 49-fold increase; *PTGDS* (Chromosome 9), 27-fold increase. Chromosome position is listed at the bottom of each panel. Mapped RNA-seq reads were imported into SeqMonk and the total numbers of reads at each base pair across the coding region of the gene quantified (right column). Quantification was imported as custom tracks into the UCSC genome browser and bedgraphs created for the *TNXB* (top panel), *AHD1B* (middle panel), and *PTDGS* (lower panel) genes. In each graph, the genomic location and scale are shown along with coding sequences (including intron and exons) for each UCSC gene. PRO and QUI indicate the bar graphs for the total reads for each sample. The scale for the number of reads is demonstrated on the left of the graph. Arrowheads indicate the direction of the genes on the chromosome. For the *TNXB* graph, the sequence from the *ATF6B* gene is shown to demonstrate near equivalent reads between the two samples. Arrowheads indicate the direction of the gene on the chromosome.

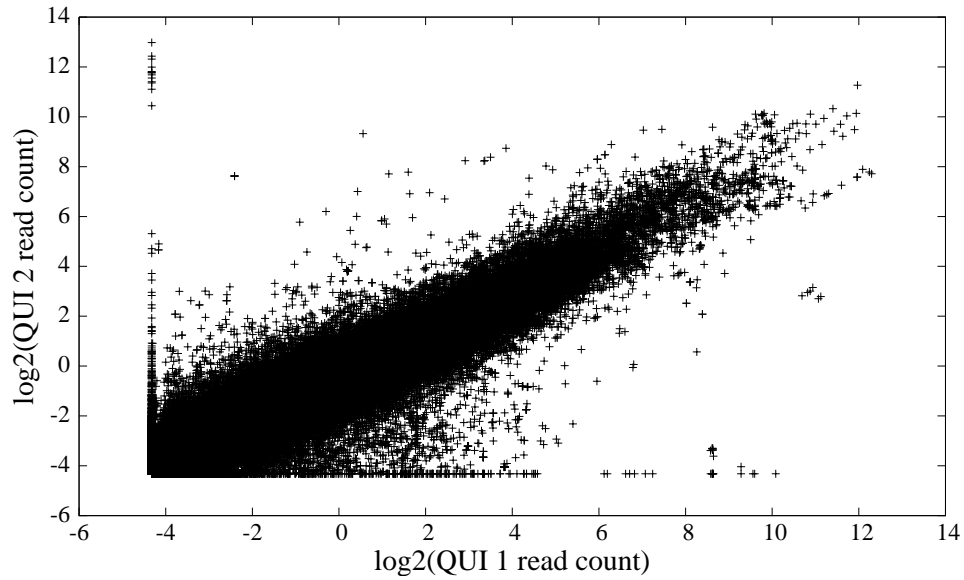

Supplementary Figure S18: The log-transformed read counts from the two RNA-seq reactions for the quiescent fibroblasts exhibited a strong linear relationship ( $r = 0.94$ ).

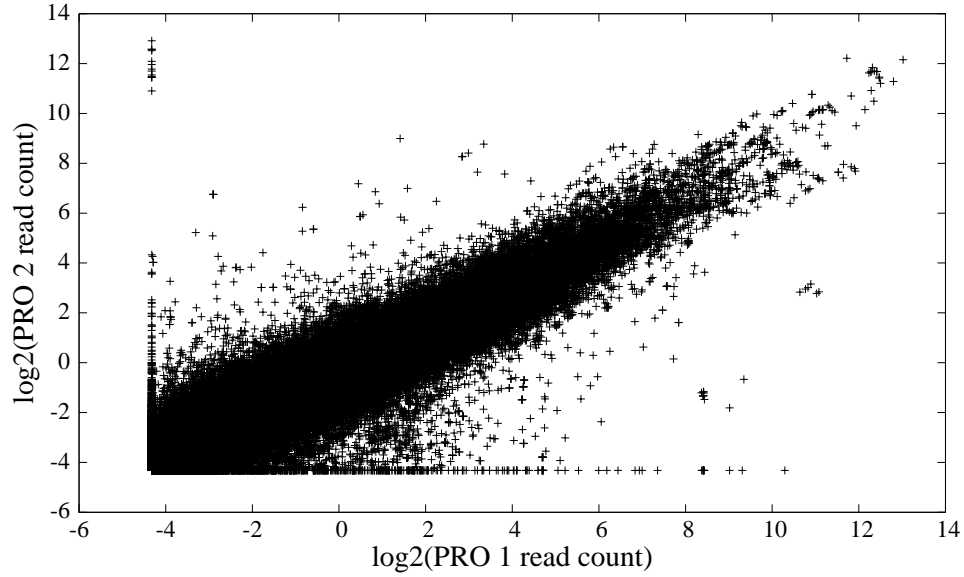

Supplementary Figure S19: The log-transformed read counts from the two RNA-seq reactions for the proliferative fibroblasts exhibited a strong linear relationship ( $r = 0.94$ ).

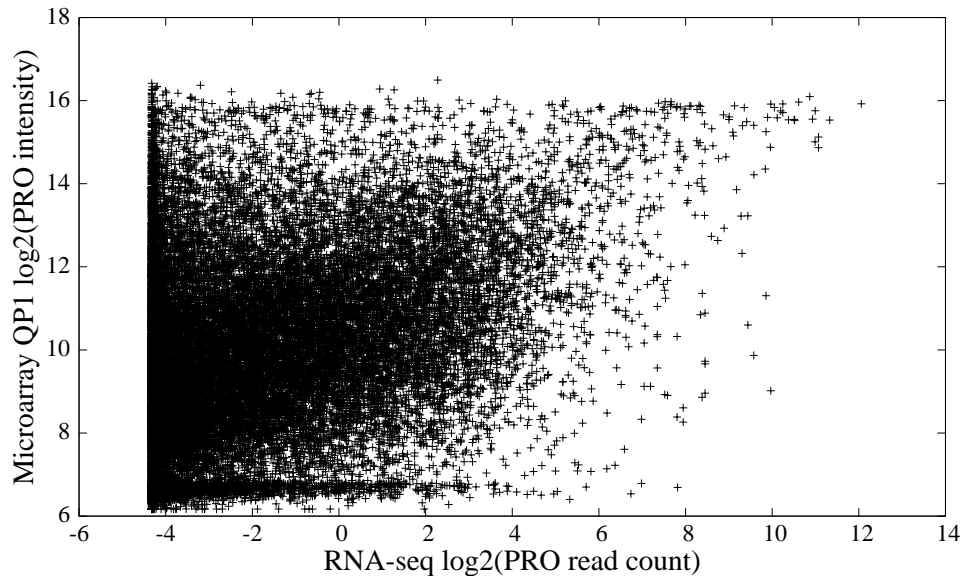

Supplementary Figure S20: The log-transformed RNA-seq read counts for PRO and the log-transformed PRO intensity values from microarray QP1 had a low correlation ( $r = 0.33$ ).

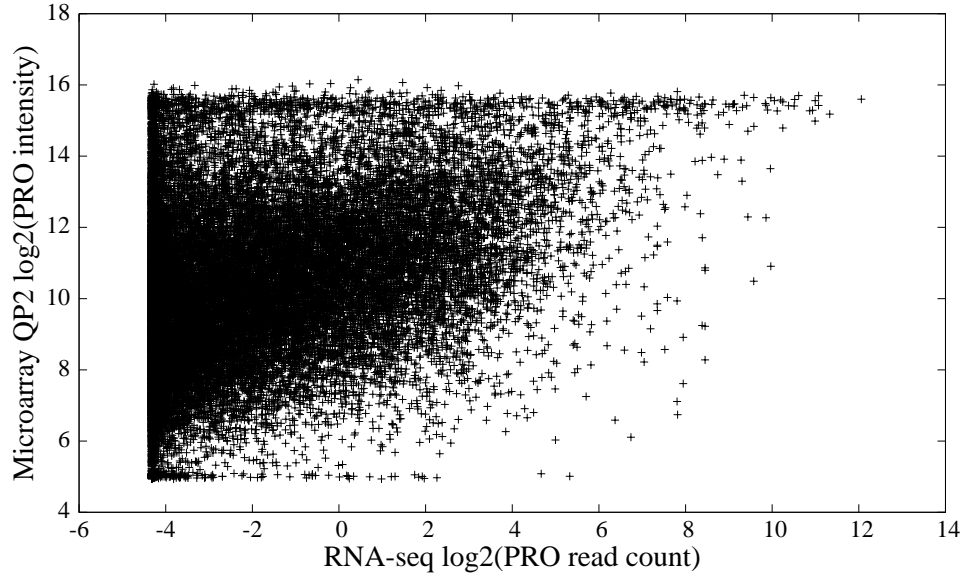

Supplementary Figure S21: The log-transformed RNA-seq read counts for PRO and the log-transformed PRO intensity values from microarray QP2 had a low correlation ( $r = 0.33$ ).

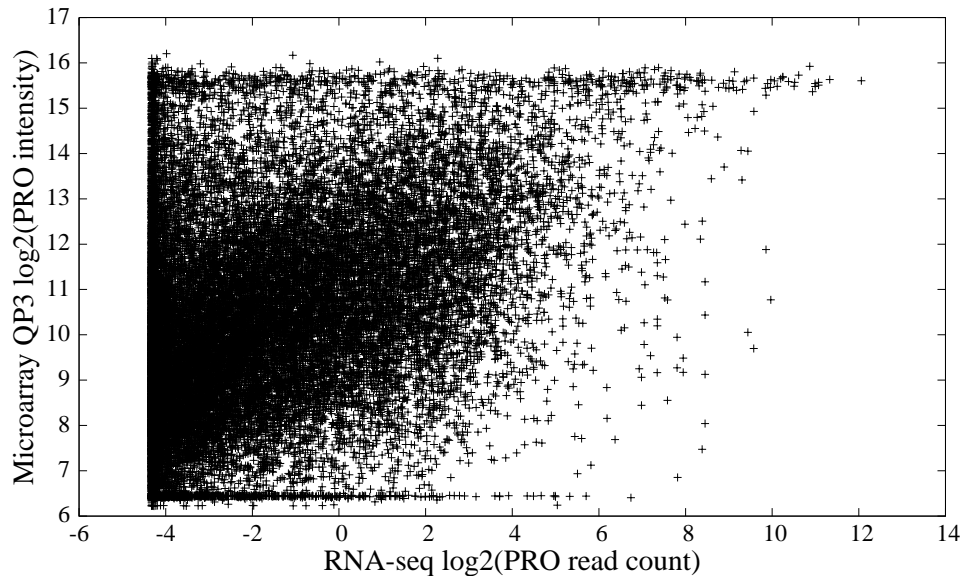

Supplementary Figure S22: The log-transformed RNA-seq read counts for PRO and the log-transformed PRO intensity values from microarray QP3 had a moderate correlation ( $r = 0.40$ ).



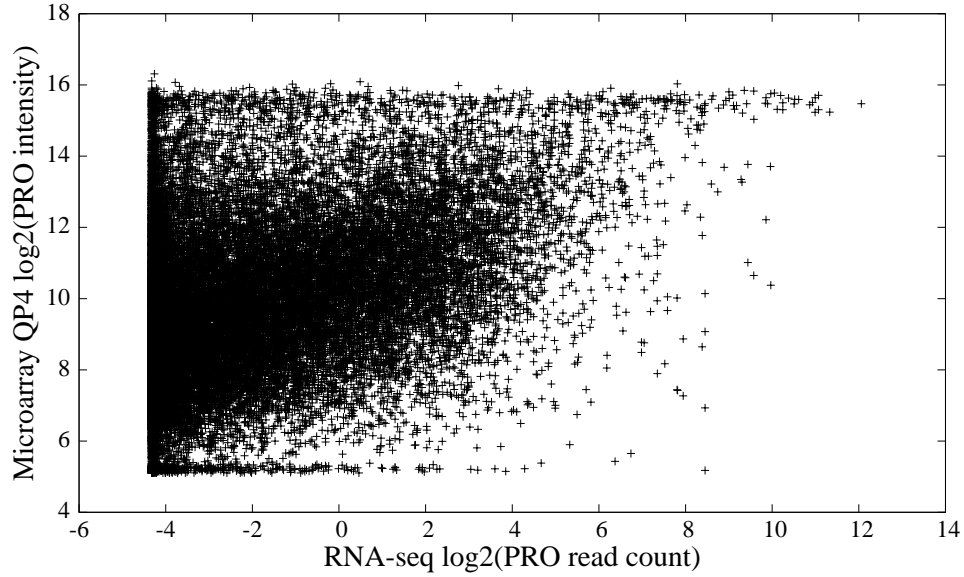

Supplementary Figure S23: The log-transformed RNA-seq read counts for PRO and the log-transformed PRO intensity values from microarray QP4 had a low correlation ( $r = 0.37$ ).

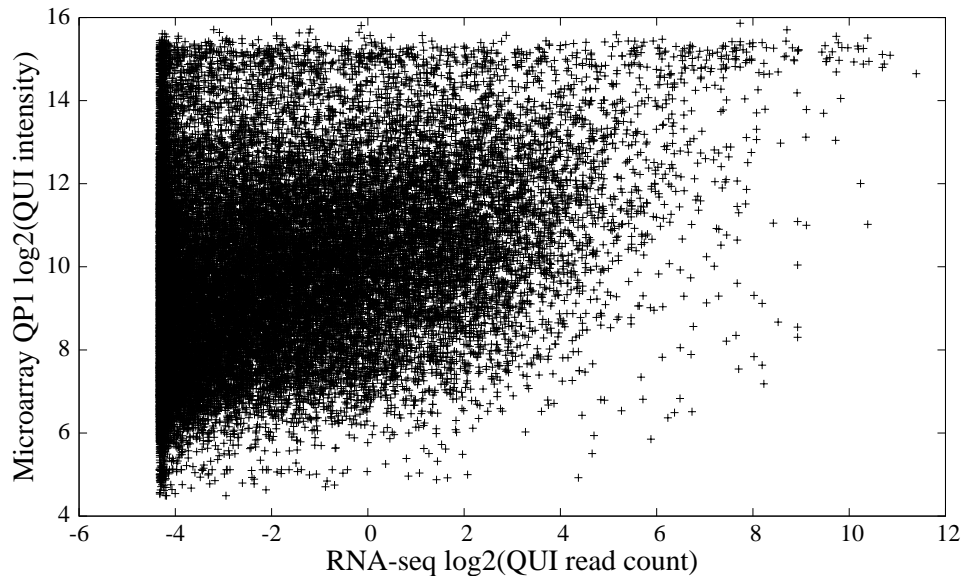

Supplementary Figure S24: The log-transformed RNA-seq read counts for QUI and the log-transformed QUI intensity values from microarray QP1 had a low correlation ( $r = 0.32$ ).

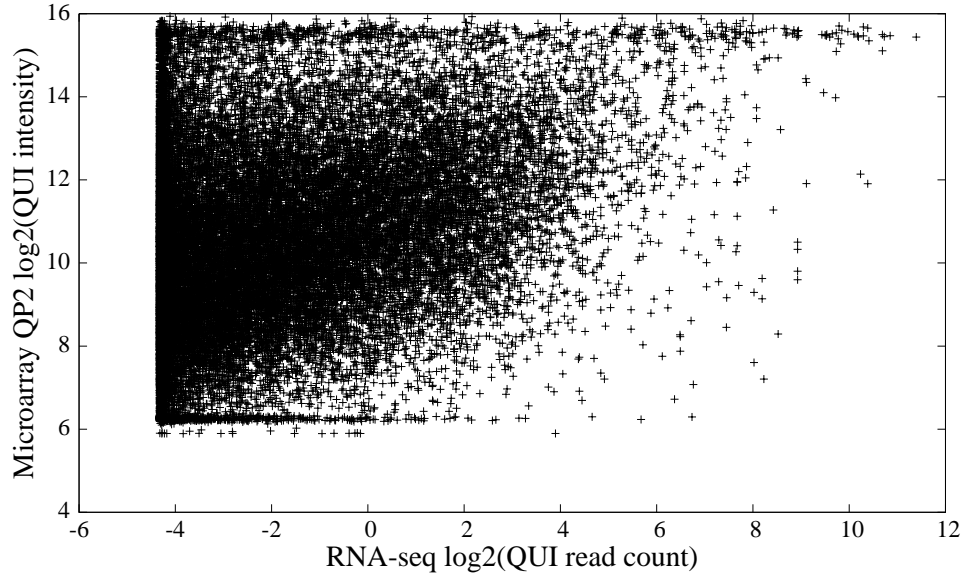

Supplementary Figure S25: The log-transformed RNA-seq read counts for QUI and the log-transformed QUI intensity values from microarray QP2 had a low correlation ( $r = 0.32$ ).

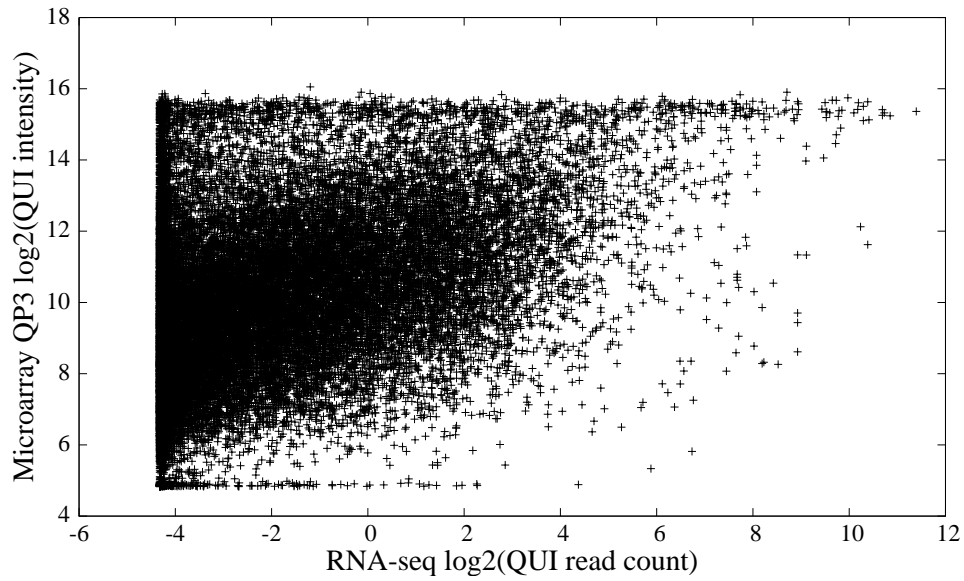

Supplementary Figure S26: The log-transformed RNA-seq read counts for QUI and the log-transformed QUI intensity values from microarray QP3 had a moderate correlation ( $r = 0.41$ ).

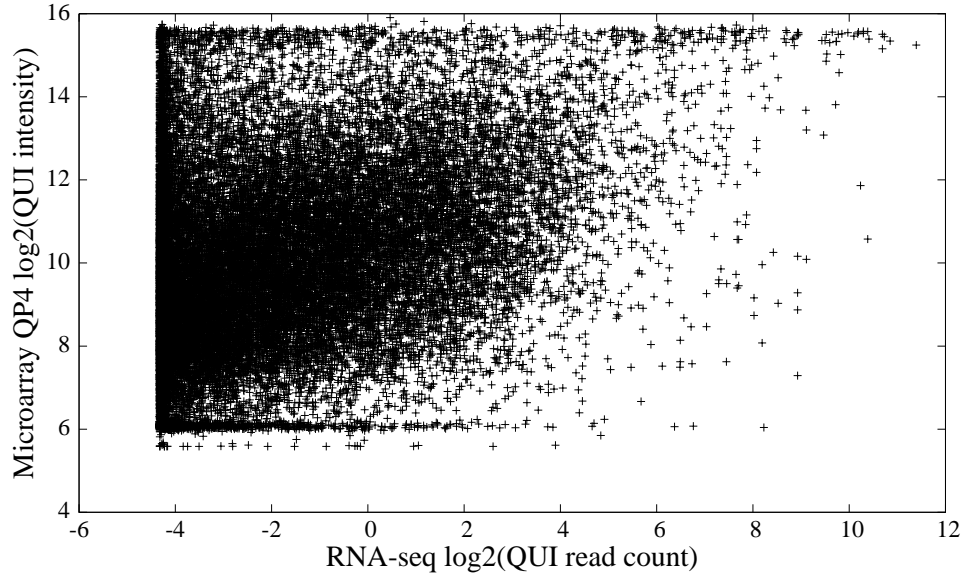

Supplementary Figure S27: The log-transformed RNA-seq read counts for QUI and the log-transformed QUI intensity values from microarray QP4 had a low correlation ( $r = 0.35$ ).

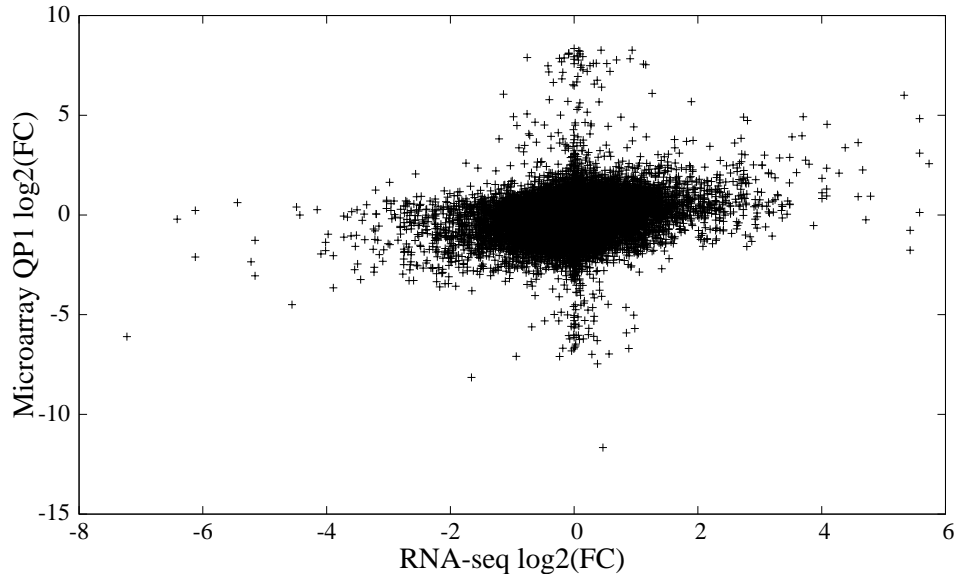

Supplementary Figure S28: The log-transformed RNA-seq FC values and the log-transformed FC values from microarray QP1 had a low correlation ( $r = 0.23$ ).

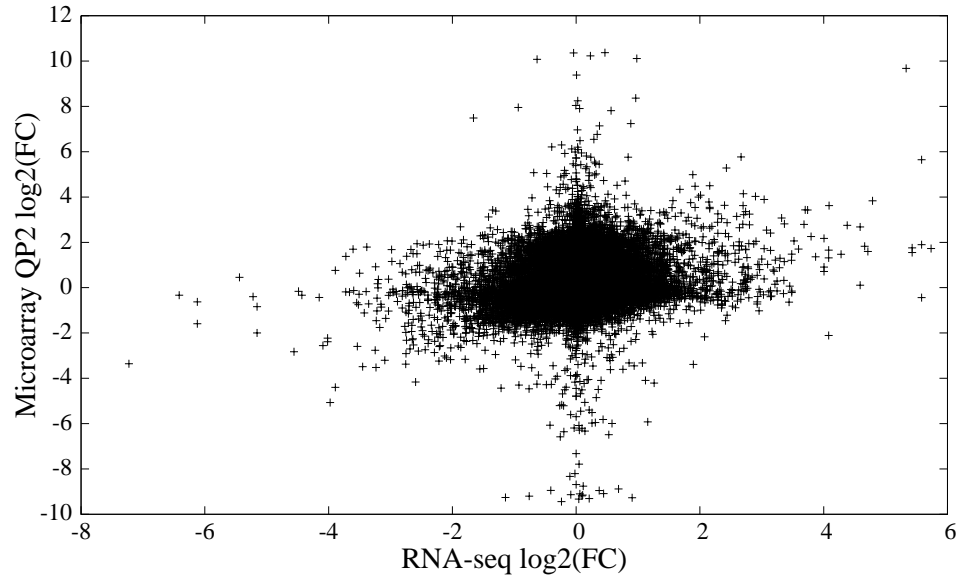

Supplementary Figure S29: The log-transformed RNA-seq FC values and the log-transformed FC values from microarray QP2 had a low correlation ( $r = 0.18$ ).

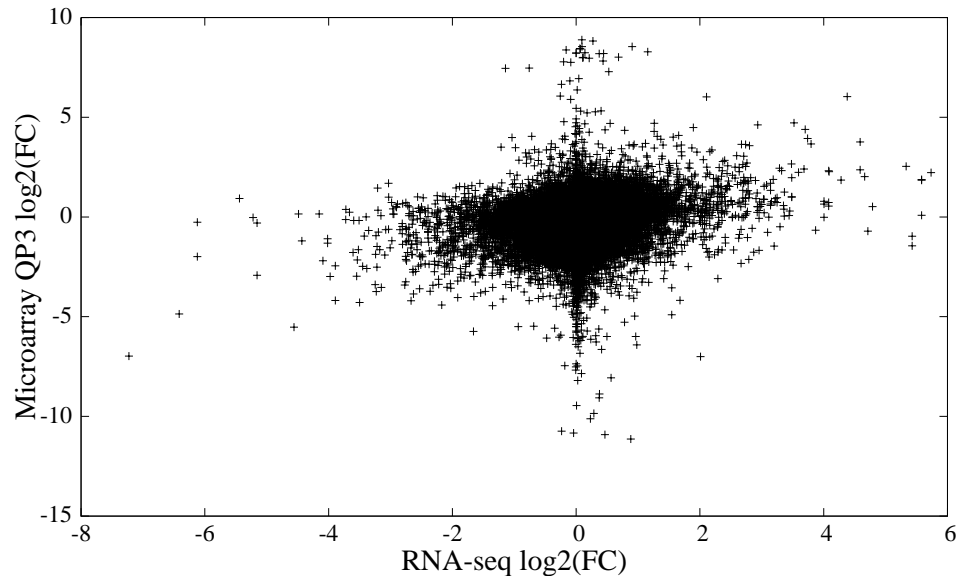

Supplementary Figure S30: The log-transformed RNA-seq FC values and the log-transformed FC values from microarray QP3 had a low correlation ( $r = 0.18$ ).

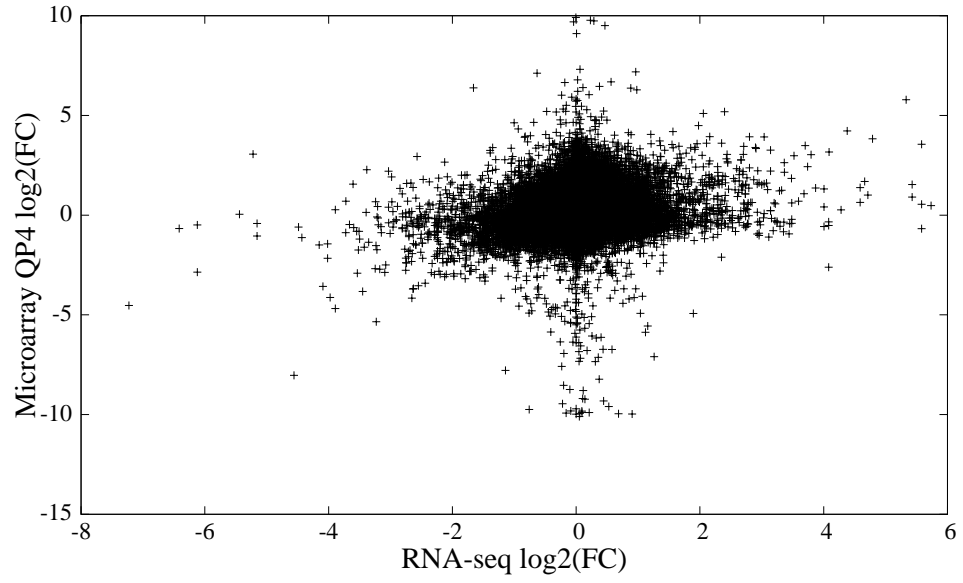

Supplementary Figure S31: The log-transformed RNA-seq FC values and the log-transformed FC values from microarray QP4 had a low correlation ( $r = 0.17$ ).

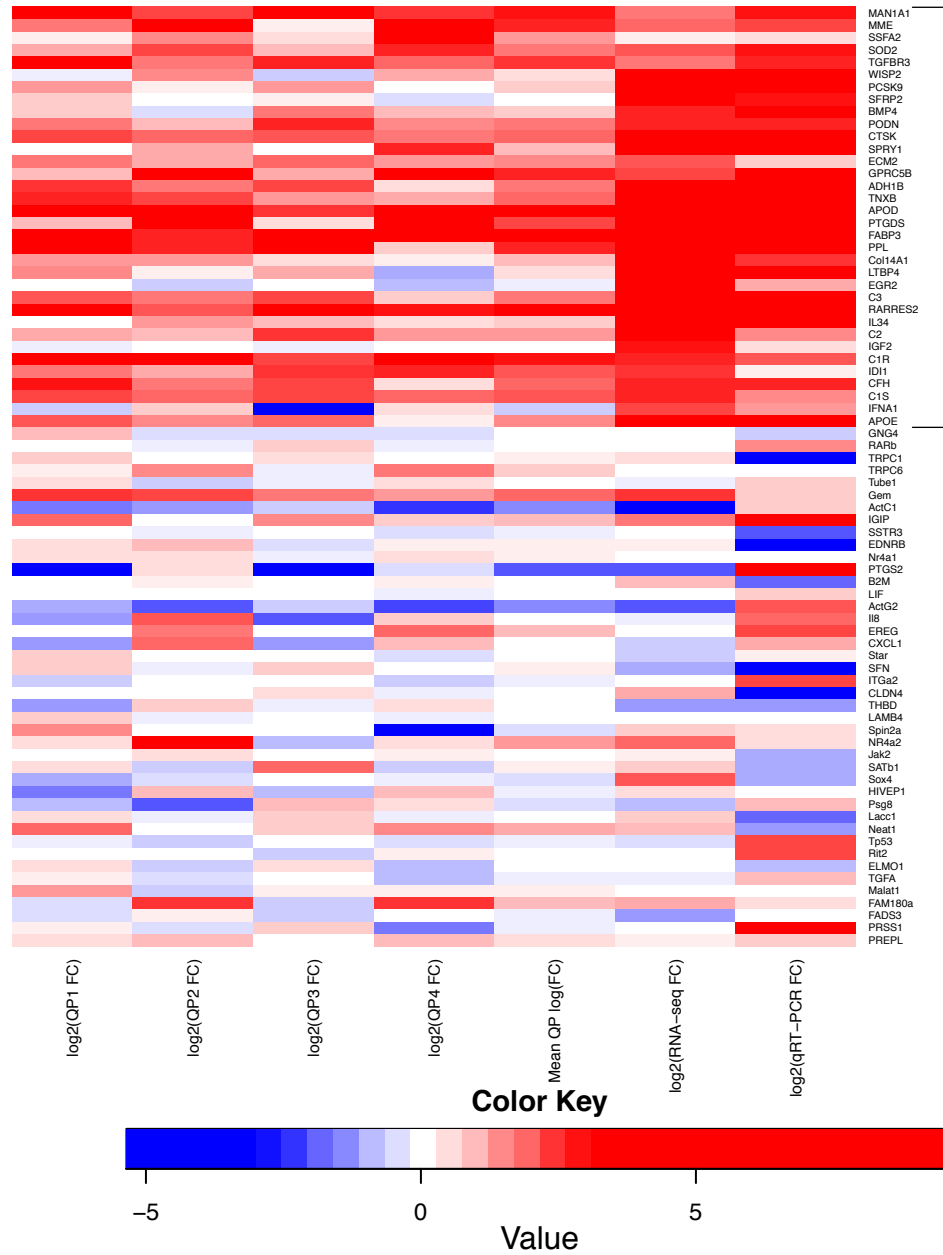

Supplementary Figure S32: Correspondence between the microarray data, the RNA-seq data, and the qRT-PCR data for the probes that were analyzed using qRT-PCR. Rows correspond to genes, while columns correspond to the source of the data (RNA-seq, qRT-PCR, one of the four microarrays, or the average of the four microarrays, which is denoted “Mean QP log<sub>2</sub>(FC)”). The color of each cell denotes the FC value for the corresponding gene and source. The bracketed genes were selected because they had a high FC value (QUI/PRO) in either the RNA-seq data, the microarray data, or both. Non-bracketed genes were selected arbitrarily. The raw values used to create this figure are given in Supplementary Table S6.

Supplementary Table S1: Microarray intensity values demonstrate high reproducibility. Correlations are shown for proliferative samples (PRO) or quiescent samples (QUI) for each pair of microarrays. For each cell state (PRO or QUI), the values in the upper diagonal contain the Pearson correlations, while those in the lower diagonal contain the Spearman correlations. Values not in parentheses represent correlations between intensity values after cross-channel correction and LOWESS normalization, while those in parentheses represent correlations after those values had also been log-transformed. As log transformation does not change the rank order, only one number is shown for the Spearman correlation for each pair. All correlations were  $\geq 0.77$ , indicating strong agreement between intensity values in all microarrays.

|     | Signal intensities for PRO |             |             |             | Signal intensities for QUI |             |             |             |
|-----|----------------------------|-------------|-------------|-------------|----------------------------|-------------|-------------|-------------|
|     | QP1                        | QP2         | QP3         | QP4         | QP1                        | QP2         | QP3         | QP4         |
| QP1 | –                          | 0.80 (0.89) | 0.91 (0.89) | 0.80 (0.87) | –                          | 0.88 (0.91) | 0.92 (0.90) | 0.88 (0.89) |
| QP2 | 0.89                       | –           | 0.78 (0.78) | 0.94 (0.94) | 0.91                       | –           | 0.85 (0.85) | 0.93 (0.92) |
| QP3 | 0.87                       | 0.77        | –           | 0.79 (0.80) | 0.89                       | 0.84        | –           | 0.89 (0.89) |
| QP4 | 0.88                       | 0.94        | 0.79        | –           | 0.89                       | 0.92        | 0.89        | –           |

Supplementary Table S2: List of probes in common among the  $n$  microarray probes with the highest FC values (geometric mean; QUI/PRO) and the  $n$  RNA-seq probes with the highest FC values, where  $n = 10, 50, 100, 500, \text{ or } 1000$ .

| Microarray probe ID | RNA-seq probe ID |
|---------------------|------------------|
| $n = 10$            |                  |
| H200006183          | APOD-001         |
| H300018610          | TNXB-001         |
| $n = 50$            |                  |
| H200006183          | APOD-001         |
| opHsV0400000146     | FABP3-001        |
| H300009988          | LRRN4CL-001      |
| H300018610          | TNXB-001         |
| H200004405          | RARRES2-001      |
| H200006911          | GPNUMB-001       |
| H200014099          | CFD-201          |
| H300005569          | PRELP-001        |
| H200005933          | PPL-001          |
| opHsV0400003635     | SBSN-001         |
| H200006005          | CLU-001          |
| H300014703          | FBLN1-001        |
| $n = 100$           |                  |
| H200006183          | APOD-001         |
| opHsV0400000146     | FABP3-001        |
| H300009988          | LRRN4CL-001      |
| H300018610          | TNXB-001         |
| H200004405          | RARRES2-001      |
| H200006911          | GPNUMB-001       |
| H300004102          | C1R-201          |
| H200014099          | CFD-201          |
| opHsV0400006073     | CFH-001          |
| H300010096          | AKR1C2-001       |
| opHsV0400008625     | C5orf4-001       |
| H300004073          | AKR1C1-001       |
| H300005569          | PRELP-001        |
| H300018014          | DCN-001          |
| H200005933          | PPL-001          |
| opHsV0400003635     | SBSN-001         |
| opHsV0400004502     | C1R-201          |
| H200000063          | FMOD-001         |
| H200006005          | CLU-001          |
| H300014703          | FBLN1-001        |
| H200001631          | PTGDS-001        |
| H200016303          | AC132217.4-001   |
| H200009651          | MFAP4-001        |
| $n = 500$           |                  |
| H200006183          | APOD-001         |
| opHsV0400000146     | FABP3-001        |
| H300009988          | LRRN4CL-001      |
| H300018610          | TNXB-001         |



|                 |                |
|-----------------|----------------|
| H200004405      | RARRES2-001    |
| H200006911      | GPNMB-001      |
| H300004102      | C1R-201        |
| H200014099      | CFD-201        |
| H300021913      | AKR1C3-001     |
| opHsV0400006073 | CFH-001        |
| H300010096      | AKR1C2-001     |
| opHsV0400008625 | C5orf4-001     |
| H200003498      | MAN1A1-001     |
| H300004073      | AKR1C1-001     |
| H300005569      | PRELP-001      |
| opHsV0400012696 | HMGCS1-001     |
| H300018014      | DCN-001        |
| H200008754      | SLC39A8-001    |
| H300001612      | PCOLCE2-001    |
| H200015788      | GPRC5B-001     |
| H200005933      | PPL-001        |
| opHsV0400005905 | ADH1A-001      |
| H200000338      | MME-001        |
| H200008154      | SERPINF1-001   |
| opHsV0400003635 | SBSN-001       |
| opHsV0400004502 | C1R-201        |
| H300009266      | TGFBR3-001     |
| H300012822      | SOD2-002       |
| opHsV0400006810 | INSIG1-001     |
| H200013052      | FADS1-001      |
| H200014059      | MMP11-001      |
| H200005322      | ABI3BP-001     |
| H200000063      | FMOD-001       |
| H200004290      | ECM2-001       |
| H200006005      | CLU-001        |
| opHsV0400004530 | SCPEP1-201     |
| H200000614      | SOD3-001       |
| H300014703      | FBLN1-001      |
| H200008006      | SEMA3C-001     |
| H200002453      | SRPX-003       |
| H200001631      | PTGDS-001      |
| opHsV0400004408 | WLS-003        |
| H300016592      | FMO1-001       |
| H200006162      | GSTM5-001      |
| H200016303      | AC132217.4-001 |
| opHsV0400001570 | CDR1-001       |
| H200001714      | SVEP1-003      |
| H300021699      | ADH1A-001      |
| H300010817      | FAP-001        |
| H200009651      | MFAP4-001      |
| H200017417      | MGP-004        |
| H200013978      | SVIL-001       |
| H300009117      | OSR2-002       |
| H200006954      | RARRES1-001    |
| H300019395      | CD36-006       |

|                 |              |
|-----------------|--------------|
| opHsV0400008225 | SCD-001      |
| H200005314      | ADAMTS5-001  |
| opHsV0400001713 | C1S-003      |
| opHsV0400001712 | C1S-003      |
| H200013753      | SERPING1-001 |
| H200000111      | FAP-001      |
| opHsV0400000317 | IDI1-004     |
| H300018881      | HMGCS1-001   |
| H200006607      | GEM-001      |
| H200007076      | CTSK-001     |
| opHsV0400005446 | CFH-001      |
| H200002762      | HSD17B14-201 |
| H300011049      | PTGES-001    |
| H200011160      | ISLR-001     |
| opHsV0400005369 | TNXB-001     |
| H200008602      | PLSCR4-001   |
| H300018456      | DCN-001      |
| H200019469      | ORAI3-001    |
| H300001186      | DMKN-001     |
| H300012124      | FBLN1-001    |
| H200012110      | AEBP1-001    |
| H200006485      | CPZ-001      |
| H300006936      | TXNIP-001    |
| opHsV0400012347 | ADAMTS5-001  |
| H300018640      | APOL1-003    |
| opHsV0400000736 | GAA-201      |
| H200006052      | CTSO-001     |
| opHsV0400000778 | ADH1B-004    |
| H300022455      | LTBP3-001    |
| H200019338      | ANG-001      |
| opHsV0400004681 | PCSK9-001    |
| H200005781      | MXRA5-001    |
| H200012213      | NPC2-008     |
| H200019931      | CTSD-001     |
| H300008317      | SMPDL3A-001  |
| opHsV0400000678 | TPP1-001     |
| H300004858      | PODN-001     |
| H200008806      | C3-001       |
| H200011421      | CDKN1C-002   |
| H200020242      | IL33-001     |
| H200014658      | DIRAS3-001   |
| H200007894      | PDGFRL-001   |
| H300015570      | FBLN2-002    |
| H200006728      | LUM-001      |
| H300016767      | PSAP-002     |
| opHsV0400004093 | ECM2-001     |
| H200014829      | FBLN2-002    |
| H300019693      | SVEP1-002    |
| opHsV0400012949 | LYNX1-001    |
| opHsV0400000297 | ASAH1-001    |
| H200006022      | CHI3L1-001   |

|                             |              |
|-----------------------------|--------------|
| opHsV0400003457             | SERPING1-001 |
| opHsV0400005637             | DPP4-001     |
| H300014091                  | COL14A1-001  |
| H300021118                  | BBC3-201     |
| H200018923                  | SOD2-002     |
| H200011779                  | FCGRT-201    |
| opHsV0400010879             | AKAP12-202   |
| H200005403                  | HTRA3-001    |
| H200007822                  | APOE-001     |
| H200006553                  | VEGFB-001    |
| H300016877                  | C2-001       |
| H300019463                  | RALGPS1-001  |
| H200007999                  | GBP2-002     |
| H200000817                  | AGT-001      |
| H300010511                  | SOD2-002     |
| opHsV0400005864             | SEPP1-001    |
| H200013247                  | VIT-001      |
| H200003669                  | PIK3IP1-001  |
| H200006891                  | NR4A2-001    |
| H200009720                  | GDF15-201    |
| H200007307                  | GPR133-001   |
| H300005309                  | TMEM35-001   |
| H200008267                  | CPXM1-001    |
| H300018457                  | GRN-201      |
| H200011392                  | SFRP4-001    |
| <hr/> <i>n</i> = 1000 <hr/> |              |
| H200006183                  | APOD-001     |
| opHsV0400000146             | FABP3-001    |
| H300009988                  | LRRN4CL-001  |
| H300018610                  | TNXB-001     |
| H200004405                  | RARRES2-001  |
| H200006911                  | GNPMB-001    |
| H300004102                  | C1R-201      |
| H200014099                  | CFD-201      |
| H300021913                  | AKR1C3-001   |
| opHsV0400006073             | CFH-001      |
| H300010096                  | AKR1C2-001   |
| opHsV0400008625             | C5orf4-001   |
| H200003498                  | MAN1A1-001   |
| H300004073                  | AKR1C1-001   |
| H300005569                  | PRELP-001    |
| opHsV0400012696             | HMGCS1-001   |
| H300018014                  | DCN-001      |
| H200008754                  | SLC39A8-001  |
| H300001612                  | PCOLCE2-001  |
| H200015788                  | GPRC5B-001   |
| H200005933                  | PPL-001      |
| opHsV0400005905             | ADH1A-001    |
| H200000338                  | MME-001      |
| H200008154                  | SERPINF1-001 |
| opHsV0400003635             | SBSN-001     |

|                 |                |
|-----------------|----------------|
| opHsV0400004502 | C1R-201        |
| H300009266      | TGFBR3-001     |
| H200003092      | FAM198B-001    |
| H300012822      | SOD2-002       |
| H300002477      | RCAN2-001      |
| opHsV0400006810 | INSIG1-001     |
| H200001408      | SFRP1-001      |
| H200013052      | FADS1-001      |
| H200014059      | MMP11-001      |
| H200005322      | ABI3BP-001     |
| H200000063      | FMOD-001       |
| H200004290      | ECM2-001       |
| H200006005      | CLU-001        |
| opHsV0400004530 | SCPEP1-201     |
| H200000614      | SOD3-001       |
| H300014703      | FBLN1-001      |
| H200008006      | SEMA3C-001     |
| H200002453      | SRPX-003       |
| H200001631      | PTGDS-001      |
| opHsV0400004408 | WLS-003        |
| H300016592      | FMO1-001       |
| H200006162      | GSTM5-001      |
| H200016303      | AC132217.4-001 |
| opHsV0400001570 | CDR1-001       |
| H200001714      | SVEP1-003      |
| H300021699      | ADH1A-001      |
| H300010817      | FAP-001        |
| H200009651      | MFAP4-001      |
| H200017417      | MGP-004        |
| H200013978      | SVIL-001       |
| H300009117      | OSR2-002       |
| H200006954      | RARRES1-001    |
| H300019395      | CD36-006       |
| opHsV0400008225 | SCD-001        |
| H200005314      | ADAMTS5-001    |
| opHsV0400001713 | C1S-003        |
| opHsV0400010717 | SEMA5A-001     |
| opHsV0400001712 | C1S-003        |
| H200013753      | SERPING1-001   |
| H200000111      | FAP-001        |
| opHsV0400000317 | IDI1-004       |
| H300018881      | HMGCS1-001     |
| H300015355      | BOC-003        |
| H200001091      | CREG1-001      |
| H200006607      | GEM-001        |
| H200007076      | CTSK-001       |
| opHsV0400005446 | CFH-001        |
| H200003843      | SAT1-001       |
| H200005947      | GJA1-001       |
| H200001130      | SLC40A1-001    |
| H200002762      | HSD17B14-201   |

|                 |             |
|-----------------|-------------|
| H300022366      | CCDC74B-001 |
| H300011049      | PTGES-001   |
| H200011160      | ISLR-001    |
| opHsV0400005369 | TNXB-001    |
| H200008602      | PLSCR4-001  |
| H300018456      | DCN-001     |
| H200005026      | HEXB-001    |
| H200019469      | ORAI3-001   |
| H300001186      | DMKN-001    |
| H300012124      | FBLN1-001   |
| H200012110      | AEBP1-001   |
| H200006485      | CPZ-001     |
| H300006936      | TXNIP-001   |
| opHsV0400012347 | ADAMTS5-001 |
| H200009211      | SC5DL-001   |
| H200013953      | BACH1-001   |
| H300018640      | APOL1-003   |
| opHsV0400000736 | GAA-201     |
| opHsV0400001994 | RCAN2-001   |
| H200006052      | CTSO-001    |
| opHsV0400000778 | ADH1B-004   |
| H300022455      | LTBP3-001   |
| H200019338      | ANG-001     |
| opHsV0400004681 | PCSK9-001   |
| H200005781      | MXRA5-001   |
| opHsV0400003760 | SAT1-001    |
| H200012213      | NPC2-008    |
| H200019931      | CTSD-001    |
| H300008317      | SMPDL3A-001 |
| opHsV0400000678 | TPP1-001    |
| H200019102      | ADD3-001    |
| H300004858      | PODN-001    |
| H200008806      | C3-001      |
| H200011421      | CDKN1C-002  |
| H200020242      | IL33-001    |
| H200014658      | DIRAS3-001  |
| H200007894      | PDGFRL-001  |
| H300015570      | FBLN2-002   |
| H200006728      | LUM-001     |
| H300016767      | PSAP-002    |
| opHsV0400012444 | FBXO32-001  |
| H200006008      | HTRA1-001   |
| opHsV0400004093 | ECM2-001    |
| H200014829      | FBLN2-002   |
| H300019693      | SVEP1-002   |
| H200006869      | GYPC-001    |
| H200004859      | F10-001     |
| H200016555      | IFI6-001    |
| opHsV0400012949 | LYNX1-001   |
| H200004464      | MYO1D-201   |
| H300015674      | SIAE-001    |

|                 |               |
|-----------------|---------------|
| H300022324      | ADAMTS13-001  |
| opHsV0400000297 | ASAH1-001     |
| H300018814      | PMP22-002     |
| H200006022      | CHI3L1-001    |
| opHsV0400003457 | SERPING1-001  |
| opHsV0400005637 | DPP4-001      |
| H300014091      | COL14A1-001   |
| H200018907      | TRIM22-001    |
| H300021118      | BBC3-201      |
| H200018923      | SOD2-002      |
| H300015796      | LSS-002       |
| H200010692      | FAM8A1-001    |
| H200011779      | FCGRT-201     |
| opHsV0400005894 | ALDH3A2-001   |
| opHsV0400010879 | AKAP12-202    |
| H200005403      | HTRA3-001     |
| H200007822      | APOE-001      |
| H200006553      | VEGFB-001     |
| H200012068      | SLC17A5-001   |
| H300019720      | LGALS3BP-201  |
| H200014286      | DRAM1-001     |
| H300016877      | C2-001        |
| H200015797      | RHOJ-001      |
| H300019463      | RALGPS1-001   |
| H200017054      | IGFBP6-001    |
| H200014757      | PGCP-001      |
| H200015671      | ITM2B-001     |
| H200007999      | GBP2-002      |
| H200016211      | ZNF219-001    |
| H200000817      | AGT-001       |
| opHsV0400002899 | THBS2-001     |
| H300010511      | SOD2-002      |
| opHsV0400005864 | SEPP1-001     |
| H200013247      | VIT-001       |
| opHsV0400004072 | MYO1D-201     |
| H200006628      | CCNG1-001     |
| opHsV0400000112 | CCNG1-001     |
| H200003669      | PIK3IP1-001   |
| H200006891      | NR4A2-001     |
| H300022033      | PDZRN3-001    |
| H200005977      | PRNP-002      |
| opHsV0400005051 | COL6A2-001    |
| H300000866      | LRRC32-001    |
| H200009720      | GDF15-201     |
| H300019371      | DDB2-201      |
| H300011696      | TGFBR2-001    |
| H200007307      | GPR133-001    |
| H300005309      | TMEM35-001    |
| opHsV0400006111 | HIST1H2AC-001 |
| H200008267      | CPXM1-001     |
| H300018457      | GRN-201       |

|                 |                   |
|-----------------|-------------------|
| H200011392      | SFRP4-001         |
| opHsV0400010785 | SLC40A1-001       |
| opHsV0400000770 | CST1-001          |
| H300007158      | CLDN11-001        |
| H200001525      | C7orf41-001       |
| H200001162      | ARHGAP20-001      |
| H200015691      | MSMO1-001         |
| H300011496      | FBLN2-002         |
| opHsV0400012025 | AC159540.1-001    |
| H300018970      | SESN1-002         |
| opHsV0400007437 | RP11-152F13.5-201 |
| H200001709      | QPRT-201          |
| H200005879      | BMP2-001          |
| H200017694      | PCDHB6-001        |
| H200007939      | PCSK6-203         |
| H300006979      | NBL1-001          |
| opHsV0400004676 | SLIT3-002         |
| opHsV0400006369 | C14orf132-001     |
| H200016323      | ZMAT3-001         |
| opHsV0400000698 | COL6A2-001        |
| H200013144      | CST3-001          |
| H300002218      | LRIG3-001         |
| H300019462      | KLF4-002          |
| H300017367      | CFHR1-001         |
| H200011747      | MMP2-001          |
| H300007781      | RARRES3-001       |
| H300022100      | ANK1-001          |
| opHsV0400011450 | ZMAT3-001         |
| opHsV0400003010 | PLD3-004          |
| H300018477      | PTPRU-001         |
| H200006117      | TP53INP1-001      |
| H300017119      | FAM46A-003        |
| H300011586      | PMP22-002         |
| opHsV0400004882 | TCEAL7-001        |
| H200010452      | C17orf58-201      |
| H200002015      | CTSF-001          |
| H300003822      | AC135178.1-201    |
| H200007928      | TFPI-201          |
| H300021603      | FKBP9-001         |
| H200008758      | TSHZ1-001         |
| H300000904      | AKAP12-001        |
| H200003862      | HIST1H2AC-201     |
| H200007344      | RENBP-004         |
| H300010195      | CCDC74A-001       |
| H300006654      | ZNFX1-AS1-001     |
| opHsV0400012080 | MBP-001           |
| H300018991      | PGF-002           |
| opHsV0400000735 | GAA-201           |
| H300009961      | SPATA18-001       |
| H200020465      | FAM102A-001       |
| H200006772      | DPT-001           |

|                 |              |
|-----------------|--------------|
| H200004653      | SULF2-001    |
| H200004209      | RAMP1-001    |
| H200005091      | CD81-001     |
| H300011592      | SH3D19-201   |
| opHsV0400002187 | KRBA2-001    |
| H200009585      | IGIP-002     |
| H300003004      | PDPN-001     |
| H300019123      | GLTSCR2-201  |
| H200017774      | PCDHB14-001  |
| H200002317      | RAB3IL1-002  |
| H200004335      | C19orf76-201 |
| H300018539      | CTSA-001     |
| opHsV0400003366 | IFITM10-001  |
| H200006892      | LAMB1-001    |
| opHsV0400004289 | APP-001      |
| H300007451      | FIBIN-001    |
| H200006910      | CHRDL1-001   |
| H200008162      | ADAM33-001   |
| opHsV0400006844 | SPRY1-002    |
| opHsV0400003609 | ADAM33-001   |
| opHsV0400004448 | PNRC1-001    |
| H200005320      | PLEKHF1-201  |
| H200000520      | TGFB3-001    |
| H300013304      | RNASET2-007  |
| H200017630      | PLTP-001     |
| H200007742      | BTN3A3-001   |
| H300006701      | C13orf16-002 |
| H200000114      | FLT3LG-201   |



Supplementary Table S3: Moderate overlap between the probes with the lowest FC values in the RNA-seq data and those with the lowest FC values in the DNA microarray data.  $k$  represents the size of a given list (the 10, 50, 100, 500, or 1000 probes with the lowest FC values), while  $n$  represents the number of probes in common between a list from the RNA-seq data and the corresponding list from the DNA microarray. The P-value represents the proportion of 10,000 random trials that had an equal or greater level of overlap than that actually observed. Thus, if none of the random trials had a greater level of overlap, then the P-value is 0. More overlapping probes than would be expected by chance were observed for all microarrays for  $k = 100, 500,$  and  $1000$ . “All” represents the geometric mean of the FC values of the four microarrays; for this dataset, more overlapping probes were detected than would be expected by chance for all list sizes.

|     | $k = 10$ |         | $k = 50$ |         | $k = 100$ |         | $k = 500$ |         | $k = 1000$ |         |
|-----|----------|---------|----------|---------|-----------|---------|-----------|---------|------------|---------|
|     | $n$      | P-value | $n$      | P-value | $n$       | P-value | $n$       | P-value | $n$        | P-value |
| QP1 | 0        | 1       | 1        | 0.08    | 6         | 0       | 74        | 0       | 156        | 0       |
| QP2 | 0        | 1       | 1        | 0.08    | 8         | 0       | 91        | 0       | 214        | 0       |
| QP3 | 0        | 1       | 2        | 0.002   | 5         | 0       | 41        | 0       | 92         | 0       |
| QP4 | 0        | 1       | 1        | 0.08    | 6         | 0       | 78        | 0       | 183        | 0       |
| All | 2        | 0       | 13       | 0       | 31        | 0       | 156       | 0       | 316        | 0       |

Supplementary Table S4: List of probes in common among the  $n$  microarray probes with the lowest FC values (geometric mean; QUI/PRO) and the  $n$  RNA-seq probes with the lowest FC values, where  $n = 10, 50, 100, 500,$  or  $1000$ .

| Microarray probe ID | RNA-seq probe ID |
|---------------------|------------------|
| $n = 10$            |                  |
| H200019509          | BEX1-001         |
| H200006097          | ID1-001          |
| $n = 50$            |                  |
| H200019509          | BEX1-001         |
| H200006097          | ID1-001          |
| H200007186          | FAM64A-201       |
| H200007019          | MMP3-001         |
| H200009826          | KRT34-201        |
| H200013276          | SERPINB7-201     |
| H200015043          | CENPM-001        |
| H200006195          | TAGLN-006        |
| H300006172          | CDC20-001        |
| H200006884          | SERPINE1-001     |
| opHsV0400006470     | KRTAP1-1-001     |
| H200018730          | KRTAP1-5-001     |
| H200018729          | KRTAP2-3-001     |
| $n = 100$           |                  |
| H200019509          | BEX1-001         |
| H200006097          | ID1-001          |
| H200007186          | FAM64A-201       |
| H200007019          | MMP3-001         |
| H200009826          | KRT34-201        |
| H200013276          | SERPINB7-201     |
| H300019126          | WNK4-201         |
| opHsV0400000209     | GIN52-001        |
| H200000064          | FOX1-001         |
| opHsV0400001096     | TPM1-001         |

|                 |              |
|-----------------|--------------|
| H200015043      | CENPM-001    |
| H300006703      | LY6K-001     |
| H200006195      | TAGLN-006    |
| H300006172      | CDC20-001    |
| H300018013      | LOXL2-001    |
| H200006884      | SERPINE1-001 |
| opHsV0400006470 | KRTAP1-1-001 |
| H200018730      | KRTAP1-5-001 |
| H200014659      | CCNB2-001    |
| H300018499      | TRIP13-001   |
| H200018729      | KRTAP2-3-001 |
| H300022133      | TPM1-005     |
| H300019521      | MYPN-001     |
| H200006072      | RRM2-001     |
| H200003347      | CCNB1-001    |
| H300018850      | CDCA3-006    |
| H200004906      | CDCA8-001    |
| H200010620      | IL6-201      |
| H200005562      | KRT18-002    |
| H200005476      | F3-001       |
| opHsV0400002741 | F3-001       |

---

$n = 500$

---

|                 |              |
|-----------------|--------------|
| H200019509      | BEX1-001     |
| H200006097      | ID1-001      |
| H200007186      | FAM64A-201   |
| H200007019      | MMP3-001     |
| H200009826      | KRT34-201    |
| H200013276      | SERPINB7-201 |
| H300019126      | WNK4-201     |
| opHsV0400000209 | GINS2-001    |
| H300020373      | TRIM55-001   |
| opHsV0400005775 | PRC1-003     |
| H300008454      | PTTG1-002    |
| opHsV0400000040 | MCM5-001     |
| H200000064      | FOXM1-001    |
| H200015606      | IL7R-001     |
| opHsV0400001096 | TPM1-001     |
| H200015043      | CENPM-001    |
| H300006703      | LY6K-001     |
| H200006195      | TAGLN-006    |
| H300006172      | CDC20-001    |
| H200019588      | CDK1-008     |
| opHsV0400010150 | C5orf13-001  |
| H200010905      | BUB1-001     |
| H300006447      | MT1G-001     |
| H200002395      | CEP55-001    |
| H300018013      | LOXL2-001    |
| H300001203      | GLIPR1-001   |
| H300009655      | MT1A-201     |
| H200006884      | SERPINE1-001 |
| opHsV0400004690 | HN1-003      |

|                 |                   |
|-----------------|-------------------|
| H200006861      | KIAA0101-001      |
| opHsV0400006470 | KRTAP1-1-001      |
| H200018730      | KRTAP1-5-001      |
| H300013149      | CDKN3-001         |
| H200014659      | CCNB2-001         |
| H300018499      | TRIP13-001        |
| H300008477      | FABP5-001         |
| H200016257      | STMN1-001         |
| H200018729      | KRTAP2-3-001      |
| H300022133      | TPM1-005          |
| H300007298      | C7orf74-001       |
| H200014737      | PTGS2-001         |
| H300021553      | NQO1-001          |
| H300019609      | NQO1-001          |
| H300008824      | MT1X-001          |
| H300019521      | MYPN-001          |
| H200014949      | HMOX1-001         |
| opHsV0400005772 | IQGAP3-001        |
| H200012382      | GTSE1-201         |
| H200006072      | RRM2-001          |
| H200012451      | SHCBP1-001        |
| H300020154      | RP11-566K11.2-202 |
| H300007657      | CKS2-001          |
| H200004941      | LPXN-001          |
| opHsV0400001663 | ARSI-001          |
| H200003347      | CCNB1-001         |
| H300018850      | CDCA3-006         |
| H200004906      | CDCA8-001         |
| H200010620      | IL6-201           |
| H200005562      | KRT18-002         |
| H200008595      | ACTN4-001         |
| H200005476      | F3-001            |
| H200006619      | MAD2L1-001        |
| H200004336      | WFDC1-001         |
| H300012606      | TRIM55-001        |
| H300006471      | MT1B-001          |
| opHsV0400002741 | F3-001            |
| H200012135      | NME1-002          |
| H200016309      | CTPS-001          |
| opHsV0400005559 | FAM83D-001        |
| H300003230      | EIF5A-001         |
| H300019718      | BIRC5-201         |
| opHsV0400000170 | MT1X-001          |
| H200005926      | MT1E-001          |
| H200011714      | SOCS2-001         |
| H200006478      | ACTG2-001         |
| H200006177      | SERPINB2-001      |
| H200008131      | ELL2-001          |
| H200007139      | CCNA2-001         |
| H200009494      | TNC-001           |
| opHsV0400011316 | CCDC99-001        |

|                 |              |
|-----------------|--------------|
| opHsV0400000552 | ACTC1-001    |
| H200014300      | SLC7A5-001   |
| opHsV0400000924 | UBE2S-201    |
| opHsV0400006176 | MALL-001     |
| H300003254      | TM4SF1-001   |
| H200011549      | CSRP1-001    |
| H300003913      | TOMM34-001   |
| opHsV0400000171 | VASP-201     |
| H200006032      | ODC1-001     |
| H300006252      | KRTAP2-2-001 |
| H300005118      | PKMYT1-001   |
| H200007088      | CDKN3-001    |
| H300001422      | CDT1-201     |
| H300005177      | EBNA1BP2-001 |
| H300016261      | CDK2-001     |
| opHsV0400001053 | EIF5AL1-001  |
| H300009765      | SKA1-001     |
| H300008566      | MT1M-201     |
| opHsV0400001284 | KRT16-001    |
| H200003504      | RNASEH2A-201 |
| H200007136      | WDR1-001     |
| H300019778      | PFKP-003     |
| H200006415      | PSRC1-001    |
| H200014980      | RHOB-001     |
| opHsV0400008974 | RAN-201      |
| H200004769      | HIST1H4C-001 |
| H200010125      | RACGAP1-001  |
| H300013069      | ANLN-001     |
| H200006537      | GGH-001      |
| H300005337      | DRAP1-001    |
| opHsV0400004474 | EIF5A-001    |
| H200006882      | CITED2-001   |
| H200001767      | TPX2-001     |
| H200009647      | TFPI2-001    |
| H300013966      | PPP1R14B-001 |
| H200002233      | ORMDL2-001   |
| H200011329      | PBK-001      |
| opHsV0400006835 | TGM2-002     |
| H300013865      | PSG5-001     |
| H300020208      | CYR61-201    |
| opHsV0400000805 | KISS1-001    |
| H200003577      | C5orf30-001  |
| H300009991      | RAB3B-001    |
| H300006913      | UBE2S-201    |
| opHsV0400004298 | MCM7-001     |
| H200018834      | DDX39A-201   |
| H200019704      | TUBA1B-001   |
| opHsV0400000182 | GCAT-001     |
| H300019578      | MAP2K3-001   |
| H300012420      | CENPA-001    |
| H300021126      | TUBA1C-001   |

|                 |                |
|-----------------|----------------|
| H300003894      | TOMM40-201     |
| H300021305      | MT1E-001       |
| H200006466      | TPM1-001       |
| opHsV0400004073 | MKI67-001      |
| H200008018      | NUAK2-001      |
| H200004400      | STRA13-001     |
| H300021488      | DTYMK-001      |
| H300001995      | HBEGF-001      |
| H200012217      | AP2S1-201      |
| opHsV0400003358 | TNC-001        |
| opHsV0400003406 | TUBB4B-001     |
| opHsV0400013002 | IL7R-001       |
| opHsV0400000345 | WDR1-013       |
| opHsV0400000753 | AC131180.1-201 |
| H200002935      | KIFC1-001      |
| H200002802      | CDK2-001       |
| H300007069      | SEMA7A-001     |
| H200016720      | KIF23-003      |
| H200004166      | CCDC99-001     |
| H200005367      | POC1A-001      |
| H200002187      | TIPARP-001     |
| H200002810      | CRIM1-001      |
| H200011653      | CORO1A-001     |
| H200007833      | ALDH1B1-001    |
| opHsV0400002502 | TUBA1B-002     |

---

$n = 1000$

---

|                 |              |
|-----------------|--------------|
| H200019509      | BEX1-001     |
| H200006097      | ID1-001      |
| H200007186      | FAM64A-201   |
| H200007019      | MMP3-001     |
| H200009826      | KRT34-201    |
| H200013276      | SERPINB7-201 |
| H300019126      | WNK4-201     |
| opHsV0400000209 | GINS2-001    |
| H300020373      | TRIM55-001   |
| opHsV0400005775 | PRC1-003     |
| H300008454      | PTTG1-002    |
| opHsV0400000040 | MCM5-001     |
| H300015276      | CENPN-001    |
| H200000064      | FOXM1-001    |
| H200015606      | IL7R-001     |
| opHsV0400001096 | TPM1-001     |
| opHsV0400004738 | ANXA2-006    |
| H200015043      | CENPM-001    |
| H300006703      | LY6K-001     |
| H200006195      | TAGLN-006    |
| H300006172      | CDC20-001    |
| H200019588      | CDK1-008     |
| opHsV0400010150 | C5orf13-001  |
| H200010905      | BUB1-001     |
| H300006447      | MT1G-001     |

|                 |                   |
|-----------------|-------------------|
| H200002395      | CEP55-001         |
| H300018013      | LOXL2-001         |
| H300001203      | GLIPR1-001        |
| H300009655      | MT1A-201          |
| H200017789      | BEX2-002          |
| H200006884      | SERPINE1-001      |
| opHsV0400004690 | HN1-003           |
| H200006861      | KIAA0101-001      |
| opHsV0400006470 | KRTAP1-1-001      |
| H200018730      | KRTAP1-5-001      |
| H200015506      | NUF2-001          |
| H300013149      | CDKN3-001         |
| H200014659      | CCNB2-001         |
| H300018499      | TRIP13-001        |
| H300008477      | FABP5-001         |
| H200016257      | STMN1-001         |
| H200018729      | KRTAP2-3-001      |
| H300022133      | TPM1-005          |
| H300007298      | C7orf74-001       |
| H200014737      | PTGS2-001         |
| H300021553      | NQO1-001          |
| H300019609      | NQO1-001          |
| H300008824      | MT1X-001          |
| H300019521      | MYPN-001          |
| H200014949      | HMOX1-001         |
| opHsV0400005772 | IQGAP3-001        |
| H200012382      | GTSE1-201         |
| H200006072      | RRM2-001          |
| H200006436      | DLGAP5-001        |
| H200012451      | SHCBP1-001        |
| H300020154      | RP11-566K11.2-202 |
| H300007657      | CKS2-001          |
| H200004941      | LPXN-001          |
| opHsV0400001663 | ARSI-001          |
| H200003347      | CCNB1-001         |
| H300018850      | CDCA3-006         |
| H200004906      | CDCA8-001         |
| H200010620      | IL6-201           |
| H200005562      | KRT18-002         |
| H200008595      | ACTN4-001         |
| H200005476      | F3-001            |
| H300022008      | KIF4A-001         |
| H200006619      | MAD2L1-001        |
| H300021996      | DEPDC1-001        |
| H200004336      | WFDC1-001         |
| H300012606      | TRIM55-001        |
| H300006471      | MT1B-001          |
| opHsV0400002741 | F3-001            |
| H300006162      | RP11-480I12.5-002 |
| H200012135      | NME1-002          |
| H200016309      | CTPS-001          |

|                 |              |
|-----------------|--------------|
| opHsV0400006230 | SMTN-001     |
| opHsV0400005559 | FAM83D-001   |
| H300003230      | EIF5A-001    |
| H300019718      | BIRC5-201    |
| opHsV0400000170 | MT1X-001     |
| H200005926      | MT1E-001     |
| H200011714      | SOCS2-001    |
| H200006478      | ACTG2-001    |
| H200006177      | SERPINB2-001 |
| opHsV0400005248 | FAM46B-001   |
| H200008131      | ELL2-001     |
| H200007139      | CCNA2-001    |
| H200009494      | TNC-001      |
| opHsV0400011316 | CCDC99-001   |
| opHsV0400000552 | ACTC1-001    |
| H200014300      | SLC7A5-001   |
| opHsV0400000924 | UBE2S-201    |
| opHsV0400006176 | MALL-001     |
| H300003254      | TM4SF1-001   |
| H200011549      | CSRP1-001    |
| H300003913      | TOMM34-001   |
| H200017742      | LRRC59-001   |
| opHsV0400000171 | VASP-201     |
| H200006032      | ODC1-001     |
| H300006252      | KRTAP2-2-001 |
| H300005118      | PKMYT1-001   |
| H200007088      | CDKN3-001    |
| H300001422      | CDT1-201     |
| H300012042      | ITGA6-001    |
| H300005177      | EBNA1BP2-001 |
| H300004589      | ULBP2-001    |
| H300016261      | CDK2-001     |
| H200006368      | SLC22A4-001  |
| opHsV0400001053 | EIF5AL1-001  |
| H300009765      | SKA1-001     |
| H300021066      | CENPN-001    |
| H300008566      | MT1M-201     |
| opHsV0400001284 | KRT16-001    |
| H200003504      | RNASEH2A-201 |
| H200007136      | WDR1-001     |
| H300019778      | PFKP-003     |
| H200006415      | PSRC1-001    |
| H200005149      | UBASH3B-001  |
| H200019789      | TUBB2A-001   |
| H200014980      | RHOB-001     |
| opHsV0400008974 | RAN-201      |
| H200004769      | HIST1H4C-001 |
| H200010125      | RACGAP1-001  |
| H300013069      | ANLN-001     |
| H200006537      | GGH-001      |
| H200000046      | CDH2-001     |

|                 |              |
|-----------------|--------------|
| H300005337      | DRAP1-001    |
| H200001306      | PAFAH1B3-201 |
| opHsV0400004474 | EIF5A-001    |
| H200006882      | CITED2-001   |
| H200001011      | UBE2T-001    |
| H300004091      | UCK2-001     |
| H200001767      | TPX2-001     |
| H200017739      | CENPN-001    |
| H200009647      | TFPI2-001    |
| H300013966      | PPP1R14B-001 |
| H200001623      | ADAMTS1-001  |
| H200008124      | SNRPA-201    |
| H200002233      | ORMDL2-001   |
| H200011329      | PBK-001      |
| opHsV0400006835 | TGM2-002     |
| opHsV0400000022 | MOK-001      |
| opHsV0400006275 | NCAPD2-001   |
| H300013865      | PSG5-001     |
| H300020208      | CYR61-201    |
| opHsV0400000805 | KISS1-001    |
| H200004554      | MXD3-201     |
| H200003577      | C5orf30-001  |
| H300009991      | RAB3B-001    |
| H300010998      | TRIM14-001   |
| H300006913      | UBE2S-201    |
| opHsV0400004298 | MCM7-001     |
| H200018834      | DDX39A-201   |
| H200019704      | TUBA1B-001   |
| H300020005      | IMPDH1-001   |
| opHsV0400000182 | GCAT-001     |
| H200007917      | GOT2-001     |
| opHsV0400006195 | TUBA4A-001   |
| H200003005      | ZWILCH-001   |
| H300019578      | MAP2K3-001   |
| H300004895      | UBE2N-001    |
| H300012420      | CENPA-001    |
| H300022630      | DPP3-201     |
| H300021126      | TUBA1C-001   |
| H200018176      | CCL2-001     |
| H300003894      | TOMM40-201   |
| H300021305      | MT1E-001     |
| H200006466      | TPM1-001     |
| opHsV0400004073 | MKI67-001    |
| H200008018      | NUAK2-001    |
| H200004400      | STRA13-001   |
| H300021488      | DTYMK-001    |
| opHsV0400001426 | PPME1-001    |
| H300001995      | HBEGF-001    |
| H200010574      | C6orf125-001 |
| H200012217      | AP2S1-201    |
| H200013972      | MCM4-001     |



|                 |                |
|-----------------|----------------|
| H200004950      | ORC6-001       |
| H300017348      | ZYX-001        |
| opHsV0400003358 | TNC-001        |
| H200010178      | SRSF2-201      |
| opHsV0400003406 | TUBB4B-001     |
| H300001508      | RPL22L1-001    |
| H200002495      | COPS6-001      |
| H300002242      | TRIM7-001      |
| opHsV0400013002 | IL7R-001       |
| opHsV0400000345 | WDR1-013       |
| H300021376      | PPP1CA-001     |
| opHsV0400000753 | AC131180.1-201 |
| H200002935      | KIFC1-001      |
| H200004731      | INCENP-001     |
| H200002802      | CDK2-001       |
| H300007069      | SEMA7A-001     |
| H200012822      | EIF4A1-001     |
| opHsV0400009148 | EIF4A1-001     |
| opHsV0400001722 | TUBB-001       |
| H200016720      | KIF23-003      |
| H200005936      | TXNDC17-001    |
| opHsV0400003249 | SRSF3-001      |
| H200019133      | WDR18-201      |
| H300003542      | PRPS1-001      |
| H200006992      | TYMS-001       |
| H200003422      | CKAP2-001      |
| H200002465      | SNRNP25-001    |
| H200006399      | DNMT1-201      |
| H300008046      | TNFRSF11B-001  |
| H200008448      | SFPQ-001       |
| H200006536      | C1QBP-201      |
| H200004166      | CCDC99-001     |
| opHsV0400001079 | LINC00311-001  |
| opHsV0400000984 | COX8A-001      |
| H300004324      | ATP5G1-001     |
| H200019650      | TMEM141-001    |
| H200005367      | POC1A-001      |
| H200002496      | FANCD2-001     |
| H200002187      | TIPARP-001     |
| H200002810      | CRIM1-001      |
| H200007728      | SRSF3-001      |
| H200011653      | CORO1A-001     |
| H200002746      | NCAPG2-001     |
| H300018868      | ENPP1-001      |
| H200007833      | ALDH1B1-001    |
| opHsV0400002502 | TUBA1B-002     |
| H200016523      | CRISPLD2-001   |
| opHsV0400001114 | MYOZ1-001      |
| H300015490      | TRIM14-001     |
| H200002701      | ETS1-201       |
| H300022614      | TPM3-003       |

|                 |                   |
|-----------------|-------------------|
| H200014262      | RCAN1-001         |
| H200005853      | KIF20A-001        |
| H200000897      | CCDC86-001        |
| H300019757      | CSE1L-001         |
| H200005718      | FAM83D-001        |
| opHsV0400001427 | PPME1-001         |
| H300011611      | SNRPB-001         |
| H300009386      | ITGA5-001         |
| H200015756      | THOC4-201         |
| opHsV0400008746 | PGAM1-001         |
| opHsV0400009836 | RP11-295G20.2-001 |
| opHsV0400000496 | DDAH1-001         |
| H200005643      | SPHK1-201         |
| H200008364      | TUBB-001          |
| H300015904      | RANGAP1-001       |
| opHsV0400005804 | HMG2N2-001        |
| H300006274      | TGM2-002          |
| H200000680      | LDHA-003          |
| H200003216      | NCEH1-201         |
| opHsV0400006685 | MT1JP-201         |
| H200000919      | FEN1-001          |
| H200006364      | CENPF-001         |
| H200014823      | GABBR2-001        |
| opHsV0400006210 | CAP1-001          |
| H300010692      | PHF19-001         |
| H200005239      | MCM2-001          |
| H200010571      | BAK1-002          |
| opHsV0400006403 | AP2S1-201         |
| H300006714      | VDAC1-002         |
| H200001635      | ESYT1-001         |
| H200008648      | ARL4D-201         |
| H200005556      | CLIC3-001         |
| opHsV0400001657 | CDCA4-001         |
| H200003976      | TRA2B-014         |
| opHsV0400000164 | HIST1H4B-001      |
| H300017857      | RFC2-001          |
| H200007673      | ATP8B1-001        |
| opHsV0400003201 | RHOC-001          |
| H200005755      | MRPS7-201         |
| H200010373      | PTPRN-001         |
| H300016550      | AURKAIP1-001      |
| H300021724      | RUVBL2-201        |
| H200012190      | H2AFZ-001         |
| H200010050      | AIMP2-001         |
| H300016680      | DEPDC1-001        |
| H300019666      | PRR11-201         |
| H300005853      | NHP2-001          |
| H300017057      | WNK4-201          |
| H200012175      | ACTN1-001         |
| H200007498      | TMEM2-001         |
| H300000861      | BOLA2-201         |

|                 |               |
|-----------------|---------------|
| H200006246      | GALE-001      |
| H300013099      | FAM64A-201    |
| H200004829      | GINS3-001     |
| H200000191      | FPGS-011      |
| H200011039      | ERCC2-001     |
| H300017880      | PLOD2-001     |
| H200016159      | TCF19-001     |
| H200005811      | CDA-001       |
| H300003166      | DCTPP1-001    |
| opHsV0400001923 | IDH2-001      |
| opHsV0400002895 | TPI1-001      |
| H200017018      | MRT04-001     |
| H200007046      | ARPC2-001     |
| H300019121      | PRMT1-001     |
| opHsV0400000259 | TACO1-201     |
| H200017078      | TUBB6-001     |
| H300001406      | CNN1-201      |
| H300013879      | CCDC99-001    |
| H300008232      | WDR62-201     |
| H300021167      | SERINC2-001   |
| opHsV0400000044 | PSME2-001     |
| H300020007      | HNRNPA2B1-001 |
| H300013153      | E2F8-002      |
| H200005726      | HIST1H3H-001  |
| H200019252      | RUVBL1-001    |
| H200005939      | ITGA7-001     |
| H200011336      | HJURP-001     |
| H200000490      | GAL-001       |
| H200005665      | HAUS8-201     |
| H300005482      | NUDT1-001     |
| H300010247      | NUTF2-001     |
| H300011776      | SERINC2-001   |
| H300003869      | GPAT2-005     |
| H200006317      | LSM4-201      |
| H200013298      | RFC2-001      |
| H200005976      | PSMD2-001     |

Supplementary Table S5: Previous studies report widely different correlations between RNA-seq data and DNA microarray data.

| Description of samples used                     | Reported correlation(s) | Reference(s) |
|-------------------------------------------------|-------------------------|--------------|
| Human embryonic kidney cells versus B cells     | 0.88                    | [7]          |
| Human liver cells versus kidney cells           | 0.67 to 0.75            | [4]          |
| Yeast cells                                     | 0.099 to 0.509          | [1, 5, 8]    |
| Human brain cells                               | 0.51 to 0.67            | [2]          |
| Male and female <i>Drosophila pseudoobscura</i> | 0.54 to 0.94            | [3]          |
| Human T cells                                   | 0.79 to 0.90            | [9]          |
| Rat nerves                                      | 0.84 to 0.85            | [6]          |
| Human proliferating or quiescent fibroblasts    | 0.02 to 0.42            | This study   |

Supplementary Table S6: Correspondence between the microarray data, the RNA-seq data, and the qRT-PCR data for the probes that were analyzed using qRT-PCR. These are the raw values used to construct Supplementary Figure S32.

| Gene    | $\log_2$ (QP1 FC) | $\log_2$ (QP2 FC) | $\log_2$ (QP3 FC) | $\log_2$ (QP4 FC) | Mean QP $\log_2$ (FC) | $\log_2$ (RNA-seq FC) | $\log_2$ (qRT-PCR FC) |
|---------|-------------------|-------------------|-------------------|-------------------|-----------------------|-----------------------|-----------------------|
| MAN1A1  | 3.37              | 2.23              | 3.56              | 2.50              | 2.91                  | 1.63                  | 3.00                  |
| MME     | 1.64              | 4.00              | 0.35              | 4.49              | 2.62                  | 1.98                  | 2.33                  |
| SSFA2   | 0.27              | 1.59              | 0.42              | 3.22              | 1.37                  | 0.21                  | 0.43                  |
| SOD2    | 1.09              | 2.31              | 0.95              | 2.73              | 1.77                  | 2.16                  | 2.97                  |
| TGFBR3  | 3.78              | 1.75              | 2.69              | 1.94              | 2.54                  | 1.62                  | 2.73                  |
| WISP2   | -0.24             | 1.60              | -0.71             | 1.01              | 0.41                  | 4.71                  | 4.44                  |
| PCSK9   | 1.32              | 0.37              | 1.33              | 0.00              | 0.75                  | 3.48                  | 4.64                  |
| SFRP2   | 0.70              | 0.07              | 0.30              | -0.43             | 0.16                  | 3.45                  | 2.82                  |
| BMP4    | 0.79              | -0.59             | 1.63              | 0.93              | 0.69                  | 2.61                  | 4.01                  |
| PODN    | 1.77              | 0.90              | 2.63              | 1.48              | 1.69                  | 2.69                  | 2.63                  |
| CTSK    | 2.26              | 1.82              | 2.02              | 1.69              | 1.95                  | 4.66                  | 5.17                  |
| SPRY1   | -0.15             | 1.15              | 0.04              | 2.63              | 0.92                  | 3.36                  | 3.38                  |
| ECM2    | 1.76              | 1.10              | 1.98              | 1.33              | 1.54                  | 2.19                  | 0.69                  |
| GPRC5B  | 0.87              | 3.63              | 1.03              | 5.19              | 2.68                  | 2.40                  | 4.86                  |
| ADH1B   | 2.57              | 1.73              | 2.22              | 0.48              | 1.75                  | 5.74                  | 3.06                  |
| TNXB    | 2.68              | 2.37              | 1.27              | 1.14              | 1.87                  | 5.58                  | 3.01                  |
| APOD    | 6.00              | 9.68              | 2.54              | 5.79              | 6.00                  | 5.33                  | 5.61                  |
| PTGDS   | 0.94              | 3.84              | 0.52              | 3.83              | 2.28                  | 4.79                  | 3.62                  |
| FABP3   | 3.37              | 2.75              | 6.04              | 4.22              | 4.10                  | 4.38                  | 5.94                  |
| PPL     | 3.63              | 2.68              | 3.76              | 0.64              | 2.68                  | 4.59                  | 8.07                  |
| Col14A1 | 1.26              | 1.26              | 0.47              | 0.39              | 0.85                  | 4.00                  | 2.43                  |
| LTBP4   | 1.53              | 0.29              | 1.20              | -1.15             | 0.47                  | 4.08                  | 3.07                  |
| EGR2    | 0.04              | -0.64             | 0.07              | -0.94             | -0.37                 | 3.44                  | 1.01                  |
| C3      | 2.12              | 1.70              | 2.24              | 0.70              | 1.69                  | 3.59                  | 4.07                  |
| RARRES2 | 3.91              | 2.06              | 4.72              | 2.98              | 3.42                  | 3.52                  | 3.88                  |
| IL34    | 0.14              | 1.22              | 0.92              | 0.56              | 0.71                  | 3.22                  | 3.03                  |
| C2      | 1.02              | 0.88              | 2.44              | 1.21              | 1.39                  | 3.29                  | 1.55                  |
| IGF2    | -0.28             | -0.18             | -0.22             | -0.04             | -0.18                 | 2.96                  | 0.55                  |
| C1R     | 3.31              | 3.01              | 2.37              | 3.15              | 2.96                  | 2.80                  | 2.06                  |
| IDI1    | 1.66              | 1.18              | 2.57              | 2.62              | 2.01                  | 2.45                  | 0.35                  |
| CFH     | 2.92              | 1.75              | 2.38              | 0.55              | 1.90                  | 2.74                  | 2.68                  |
| C1S     | 2.27              | 1.84              | 2.37              | 1.87              | 2.09                  | 2.63                  | 1.59                  |
| IFNA1   | -0.66             | 0.64              | -3.09             | 0.51              | -0.65                 | 2.29                  | 1.21                  |
| APOE    | 2.10              | 1.47              | 1.85              | 0.27              | 1.42                  | 4.28                  | 3.98                  |
| GNG4    | 0.98              | -0.54             | -0.55             | -0.41             | -0.13                 | 0.12                  | -0.64                 |
| RARB    | 0.10              | -0.34             | 0.70              | -0.34             | 0.03                  | 0.01                  | 1.59                  |
| TRPC1   | 0.74              | -0.07             | 0.52              | 0.17              | 0.34                  | 0.40                  | -5.35                 |
| TRPC6   | 0.25              | 1.42              | -0.22             | 1.75              | 0.80                  | 0.15                  | 0.05                  |
| Tube1   | 0.51              | -0.62             | -0.31             | 0.51              | 0.02                  | -0.39                 | 0.64                  |
| Gem     | 2.46              | 2.25              | 1.80              | 1.30              | 1.95                  | 2.46                  | 0.73                  |

|         |       |       |       |       |       |       |       |
|---------|-------|-------|-------|-------|-------|-------|-------|
| ActC1   | -1.75 | -1.36 | -0.64 | -2.50 | -1.56 | -3.08 | 0.77  |
| IGIP    | 1.94  | -0.19 | 1.41  | 0.72  | 0.97  | 1.69  | 3.02  |
| SSTR3   | 0.03  | -0.40 | 0.04  | -0.53 | -0.21 | -0.01 | -2.12 |
| EDNRB   | 0.52  | 0.98  | -0.57 | 0.22  | 0.29  | 0.32  | -4.44 |
| Nr4a1   | 0.47  | 0.46  | -0.25 | 0.44  | 0.28  | -0.07 | -0.01 |
| PTGS2   | -3.61 | 0.49  | -4.41 | -0.58 | -2.03 | -2.17 | 3.48  |
| B2M     | -0.16 | 0.27  | 0.01  | 0.30  | 0.10  | 0.90  | -1.84 |
| LIF     | -0.05 | -0.05 | 0.17  | -0.21 | -0.03 | -0.02 | 0.78  |
| ActG2   | -1.05 | -2.20 | -0.74 | -2.39 | -1.60 | -2.15 | 2.08  |
| Il8     | -1.37 | 2.01  | -2.14 | 0.79  | -0.18 | -0.28 | 1.94  |
| EREG    | 0.11  | 1.67  | -0.02 | 1.94  | 0.92  | 0.06  | 2.39  |
| CXCL1   | -1.21 | 1.86  | -1.28 | 0.97  | 0.09  | -0.69 | 1.14  |
| Star    | 0.77  | -0.10 | 0.01  | -0.50 | 0.05  | -0.68 | 0.23  |
| SFN     | 0.66  | -0.22 | 0.60  | 0.00  | 0.26  | -1.06 | -4.18 |
| ITGa2   | -0.62 | 0.03  | -0.14 | -0.66 | -0.35 | 0.06  | 2.28  |
| CLDN4   | 0.09  | -0.10 | 0.50  | -0.28 | 0.05  | 1.04  | -3.47 |
| THBD    | -1.30 | 0.74  | -0.20 | 0.57  | -0.05 | -1.31 | -1.38 |
| LAMB4   | 0.74  | -0.27 | 0.14  | -0.29 | 0.08  | -0.03 | -0.13 |
| Spin2a  | 1.50  | -0.12 | 0.17  | -3.30 | -0.44 | 0.66  | 0.52  |
| NR4a2   | 0.42  | 4.99  | -0.86 | 0.54  | 1.27  | 1.89  | 0.52  |
| Jak2    | -0.07 | 0.47  | -0.03 | 0.34  | 0.18  | 0.25  | -1.13 |
| SATb1   | 0.48  | -0.67 | 1.84  | -0.78 | 0.22  | 0.71  | -1.13 |
| Sox4    | -1.11 | -0.46 | 0.06  | -0.33 | -0.46 | 2.01  | -1.03 |
| HIVEP1  | -1.77 | 0.99  | -0.91 | 0.84  | -0.21 | 0.43  | -0.14 |
| Psg8    | -0.97 | -2.09 | 0.88  | 0.41  | -0.44 | -0.89 | 0.93  |
| Lacc1   | 0.56  | -0.24 | 0.67  | -0.38 | 0.15  | 0.77  | -1.84 |
| Neat1   | 1.91  | 0.06  | 0.64  | 1.42  | 1.01  | 0.96  | -1.35 |
| Tp53    | -0.25 | -0.67 | 0.03  | -0.57 | -0.36 | -0.47 | 2.35  |
| Rit2    | 0.14  | -0.20 | -0.62 | 0.34  | -0.08 | 0.01  | 2.34  |
| ELMO1   | 0.46  | -0.64 | 0.51  | -0.83 | -0.13 | 0.02  | -0.83 |
| TGFA    | 0.22  | -0.48 | 0.00  | -0.87 | -0.28 | -0.28 | 0.96  |
| Malat1  | 1.29  | -0.66 | 0.35  | 0.26  | 0.31  | 0.18  | -0.05 |
| FAM180a | -0.57 | 2.46  | -0.78 | 2.47  | 0.90  | 1.10  | 0.60  |
| FADS3   | -0.52 | 0.31  | -0.71 | 0.08  | -0.21 | -1.33 | -0.05 |
| PRSS1   | 0.35  | -0.41 | 0.69  | -1.64 | -0.25 | 0.00  | 4.86  |
| PREPL   | 0.44  | 0.82  | 0.08  | 0.82  | 0.54  | 0.35  | 0.75  |

Supplementary Table S7: Parameter values used for SeqMonk.

| Parameter name                    | Value             |
|-----------------------------------|-------------------|
| <b>Importing data</b>             |                   |
| Remove duplicate reads            | no                |
| Treat as HiC data                 | no                |
| Min mapping quality               | 0                 |
| Split spliced reads               | yes               |
| Import introns rather than exons  | no                |
| Data type                         | Paired end        |
| Pair distance cutoff (bp)         | 1000              |
| <b>Generating probes</b>          |                   |
| Type Feature                      | probe generator   |
| Features to design around         | mRNA              |
| Split into subfeatures (exons)    | no                |
| Remove exact duplicates           | no                |
| Ignore feature strand information | no                |
| Make probes                       | Over feature      |
| <b>Read count quantitation</b>    |                   |
| Count reads on strand             | All reads         |
| Correct for total read count      | yes               |
| Correct to what?                  | Per million reads |
| Count total only within probes    | no                |
| Correct for probe length          | yes               |
| Log transform count               | no                |
| Count duplicated reads only once  | no                |
| Only quantitate visible stores    | no                |

## References

- [1] L David, W Huber, M Granovskaia, J Toedling, C J Palm, L Bofkin, T Jones, R W Davis, and L M Steinmetz. A high-resolution map of transcription in the yeast genome. *Proc Natl Acad Sci U S A*, 103(14):5320–5, 2006.
- [2] X Fu, N Fu, S Guo, Z Yan, Y Xu, H Hu, C Menzel, W Chen, Y Li, R Zeng, and P Khaitovich. Estimating accuracy of RNA-Seq and microarrays with proteomics. *BMC Genomics*, 10:161, 2009.
- [3] J H Malone and B Oliver. Microarrays, deep sequencing and the true measure of the transcriptome. *BMC Biol*, 9:34, 2011.
- [4] J C Marioni, C E Mason, S M Mane, M Stephens, and Y Gilad. RNA-seq: an assessment of technical reproducibility and comparison with gene expression arrays. *Genome Res*, 18(9):1509–17, 2008.
- [5] U Nagalakshmi, Z Wang, K Waern, C Shou, D Raha, M Gerstein, and M Snyder. The transcriptional landscape of the yeast genome defined by RNA sequencing. *Science*, 320(5881):1344–9, 2008.
- [6] J R Perkins, A Antunes-Martins, M Calvo, J Grist, W Rust, R Schmid, T Hildebrandt, M Kohl, C Orengo, S B McMahon, and D L H Bennett. A comparison of RNA-seq and exon arrays for whole genome transcription profiling of the L5 spinal nerve transection model of neuropathic pain in the rat. *Mol Pain*, 10:7, 2014.
- [7] Marc Sultan, Marcel H Schulz, Hugues Richard, Alon Magen, Andreas Klingenhoff, Matthias Scherf, Martin Seifert, Tatjana Borodina, Aleksey Soldatov, Dmitri Parkhomchuk, Dominic Schmidt, Sean O’Keeffe, Stefan Haas, Martin Vingron, Hans Lehrach, and Marie-Laure Yaspo. A global view of gene activity and alternative splicing by deep sequencing of the human transcriptome. *Science*, 321(5891):956–60, 2008.
- [8] Z Wang, M Gerstein, and M Snyder. RNA-Seq: a revolutionary tool for transcriptomics. *Nat Rev Genet*, 10(1):57–63, 2009.
- [9] S Zhao, W-P Fung-Leung, A Bittner, K Ngo, and X Liu. Comparison of RNA-Seq and microarray in transcriptome profiling of activated T cells. *PLoS One*, 9(1):e78644, 2014.
